# Supplementary material
Source: PubMed Central journal article supplement (PMC3151328)
Supplement: NIHMS282215-supplement-Supplementary_Data.pdf [file NIHMS282215-supplement-Supplementary_Data.pdf]

## Dipole Preserving and Polarization Consistent Charges

Peng Zhang, Peng Bao, and Jiali Gao\*

Department of Chemistry, Digital Technology Center and Supercomputing Institute

University of Minnesota, Minneapolis, MN 55455

Email: gao@jialigao.org

Partial atomic charges obtained from Mulliken population analysis, the present dipole preserving charge (DPC) analysis (polarization is absent for a single molecule in the gas phase), and the class IV CM2 model using the Austin Model 1 (AM1) Hamiltonian. All calculations are performed at the optimized geometry using AM1 at the conformation as illustrated in this supporting information. Atomic coordinates are not listed since the calculations can be repeated with little efforts.

# Alcohols and water

# Water

**-0.3827**

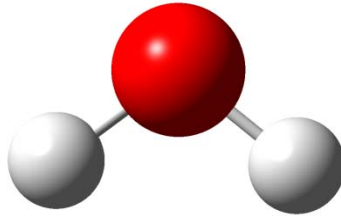

**+0.1914**

**+0.1914**

Mulliken

**-0.7113**

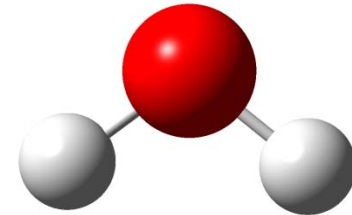

**+0.3556**

**+0.3556**

CM2 Charge

**-0.6510**

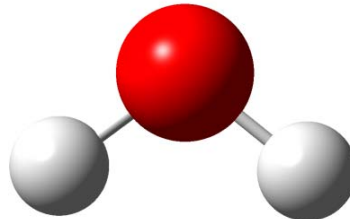

**+0.3255**

**+0.3255**

DPPC

\*All the calculations are using AM1 wave function

# 1,2-ethanediol

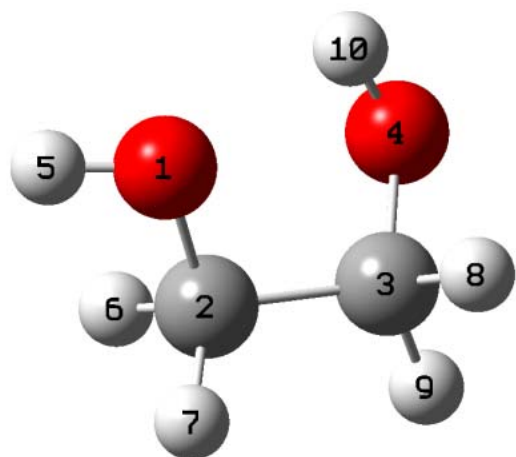

| ATOM NO. | TYPE | MULLIKEN | DPPC    | CM2       |
|----------|------|----------|---------|-----------|
| 1        | O    | -0.3389  | -0.4731 | -0.537193 |
| 2        | C    | -0.0640  | 0.0033  | 0.014506  |
| 3        | C    | -0.0181  | 0.0534  | 0.060906  |
| 4        | O    | -0.3274  | -0.4917 | -0.525138 |
| 5        | H    | 0.2054   | 0.3047  | 0.361812  |
| 6        | H    | 0.0762   | 0.0792  | 0.058008  |
| 7        | H    | 0.0702   | 0.0618  | 0.052104  |
| 8        | H    | 0.0770   | 0.0645  | 0.058903  |
| 9        | H    | 0.1065   | 0.0759  | 0.088369  |
| 10       | H    | 0.2132   | 0.3220  | 0.367725  |

# ethanol

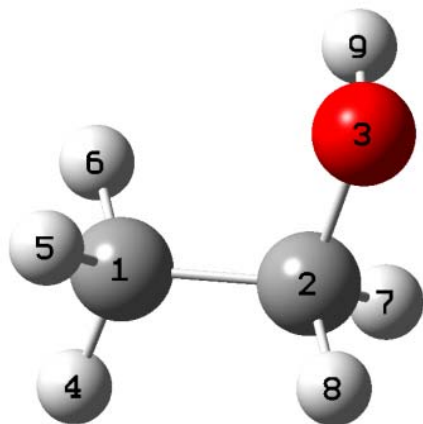

| ATOM NO. | TYPE | MULLIKEN | DPPC    | CM2     |
|----------|------|----------|---------|---------|
| 1        | C    | -0.2538  | -0.2442 | -0.1965 |
| 2        | C    | -0.0244  | 0.0547  | 0.0540  |
| 3        | O    | -0.3270  | -0.4891 | -0.5264 |
| 4        | H    | 0.0842   | 0.0791  | 0.0652  |
| 5        | H    | 0.0884   | 0.0865  | 0.0694  |
| 6        | H    | 0.0727   | 0.0730  | 0.0536  |
| 7        | H    | 0.0607   | 0.0533  | 0.0426  |
| 8        | H    | 0.1045   | 0.0782  | 0.0863  |
| 9        | H    | 0.1949   | 0.3085  | 0.3518  |

# 2-propannol

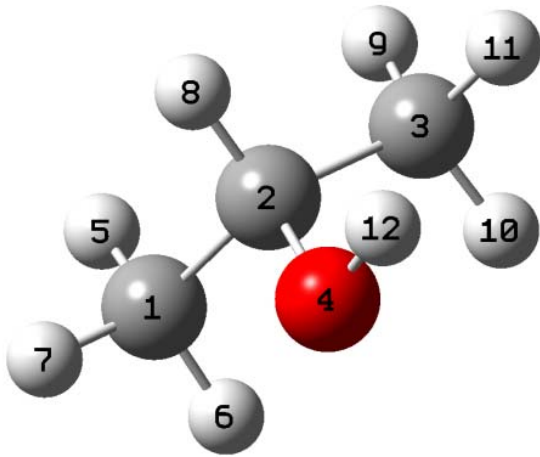

| ATOM NO. | TYPE | MULLIKEN | DPPC    | CM2       |
|----------|------|----------|---------|-----------|
| 1        | C    | -0.2091  | -0.2085 | -0.152102 |
| 2        | C    | 0.0276   | 0.1155  | 0.086625  |
| 3        | C    | -0.2499  | -0.2426 | -0.192476 |
| 4        | O    | -0.3291  | -0.4878 | -0.527778 |
| 5        | H    | 0.0766   | 0.0669  | 0.05767   |
| 6        | H    | 0.0860   | 0.0799  | 0.067005  |
| 7        | H    | 0.0888   | 0.0786  | 0.069802  |
| 8        | H    | 0.0679   | 0.0567  | 0.05008   |
| 9        | H    | 0.0844   | 0.0796  | 0.06536   |
| 10       | H    | 0.0884   | 0.0865  | 0.069424  |
| 11       | H    | 0.0720   | 0.0706  | 0.0529    |
| 12       | H    | 0.1964   | 0.3047  | 0.3535    |

# phenol

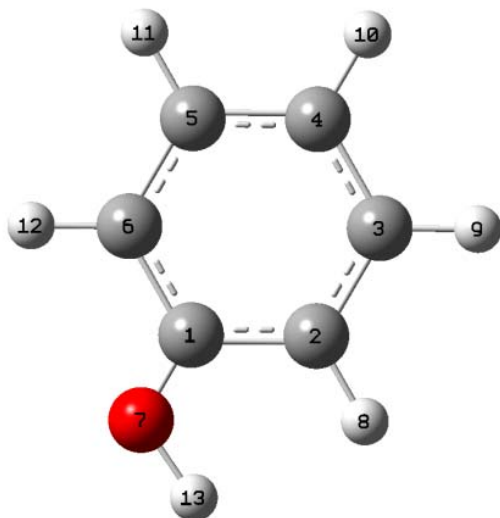

| ATOM NO. | TYPE | MULLIKEN | DPPC    | CM2     |
|----------|------|----------|---------|---------|
| 1        | C    | 0.0779   | 0.2009  | 0.1238  |
| 2        | C    | -0.2134  | -0.1912 | -0.1945 |
| 3        | C    | -0.0916  | -0.0611 | -0.0734 |
| 4        | C    | -0.1656  | -0.1358 | -0.1473 |
| 5        | C    | -0.0970  | -0.0690 | -0.0789 |
| 6        | C    | -0.1566  | -0.1420 | -0.1381 |
| 7        | O    | -0.2527  | -0.4378 | -0.4543 |
| 8        | H    | 0.1327   | 0.1015  | 0.1147  |
| 9        | H    | 0.1322   | 0.0982  | 0.1141  |
| 10       | H    | 0.1333   | 0.0998  | 0.1152  |
| 11       | H    | 0.1339   | 0.0997  | 0.1159  |
| 12       | H    | 0.1497   | 0.1078  | 0.1318  |
| 13       | H    | 0.2173   | 0.3290  | 0.3710  |

# methanol

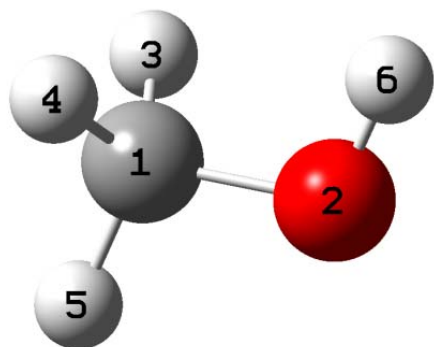

| ATOM NO. | TYPE | MULLIKEN | DPPC    | CM2     |
|----------|------|----------|---------|---------|
| 1        | C    | -0.0733  | -0.0136 | 0.0251  |
| 2        | O    | -0.3260  | -0.4774 | -0.5263 |
| 3        | H    | 0.0529   | 0.0547  | 0.0345  |
| 4        | H    | 0.0530   | 0.0547  | 0.0345  |
| 5        | H    | 0.0980   | 0.0760  | 0.0795  |
| 6        | H    | 0.1954   | 0.3055  | 0.3528  |



# cyclopropanol

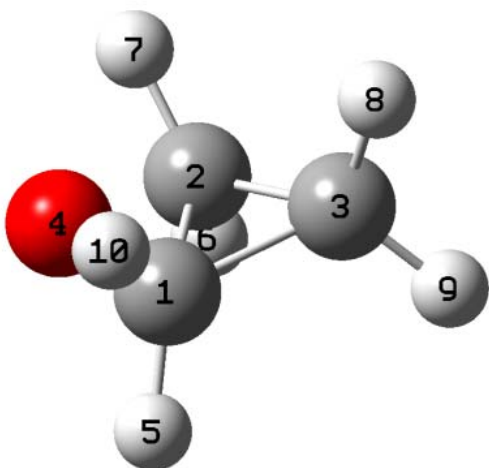

| ATOM NO. | TYPE | MULLIKEN | DPPC    | CM2     |
|----------|------|----------|---------|---------|
| 1        | C    | -0.0407  | 0.0708  | 0.1310  |
| 2        | C    | -0.1987  | -0.1647 | -0.1278 |
| 3        | C    | -0.2487  | -0.2216 | -0.1843 |
| 4        | O    | -0.2961  | -0.4895 | -0.6877 |
| 5        | H    | 0.1156   | 0.0796  | 0.0623  |
| 6        | H    | 0.1123   | 0.0925  | 0.0740  |
| 7        | H    | 0.1248   | 0.1057  | 0.0874  |
| 8        | H    | 0.1169   | 0.1021  | 0.0837  |
| 9        | H    | 0.1120   | 0.0932  | 0.0747  |
| 10       | H    | 0.2026   | 0.3318  | 0.4866  |

# cyclobutanol

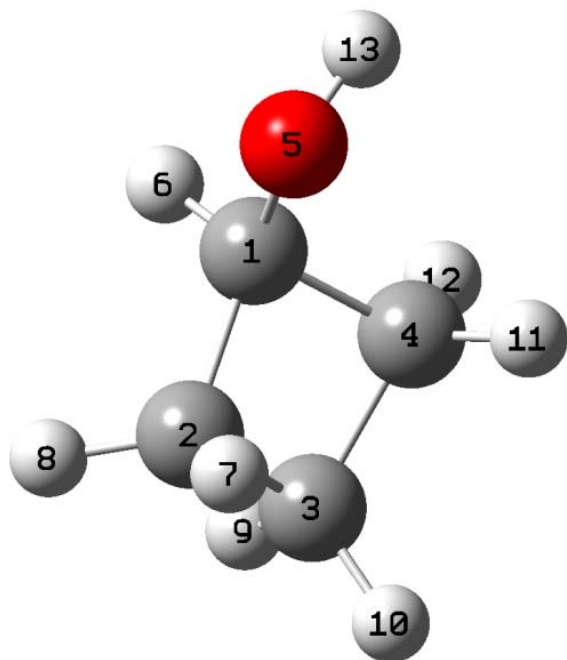

| ATOM NO. | TYPE | MULLIKEN | DPPC    | CM2     |
|----------|------|----------|---------|---------|
| 1        | C    | 0.0073   | 0.0985  | 0.0673  |
| 2        | C    | -0.1657  | -0.1522 | -0.1284 |
| 3        | C    | -0.1685  | -0.1493 | -0.131  |
| 4        | C    | -0.2092  | -0.1913 | -0.1714 |
| 5        | O    | -0.3148  | -0.4831 | -0.5135 |
| 6        | H    | 0.0824   | 0.0638  | 0.0646  |
| 7        | H    | 0.1098   | 0.0934  | 0.0912  |
| 8        | H    | 0.0916   | 0.0783  | 0.0729  |
| 9        | H    | 0.0874   | 0.0760  | 0.0687  |
| 10       | H    | 0.0929   | 0.0812  | 0.0742  |
| 11       | H    | 0.0975   | 0.0921  | 0.0788  |
| 12       | H    | 0.0899   | 0.0795  | 0.0712  |
| 13       | H    | 0.1994   | 0.3132  | 0.3553  |

# Anti-1,2-propanediol

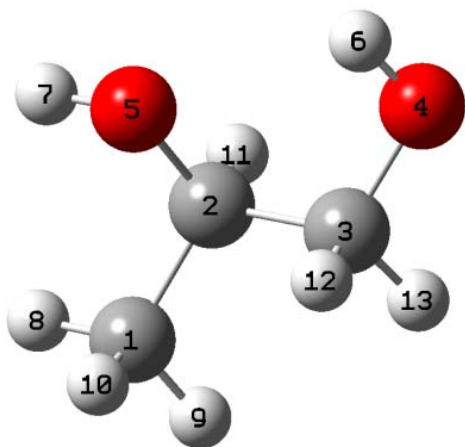

| ATOM NO. | TYPE | MULLIKEN | DPPC    | CM2     |
|----------|------|----------|---------|---------|
| 1        | C    | -0.2474  | -0.2415 | -0.1900 |
| 2        | C    | -0.0154  | 0.0671  | 0.0440  |
| 3        | C    | -0.0114  | 0.0570  | 0.0678  |
| 4        | O    | -0.3268  | -0.4917 | -0.5244 |
| 5        | O    | -0.3399  | -0.4689 | -0.5373 |
| 6        | H    | 0.2151   | 0.3191  | 0.3692  |
| 7        | H    | 0.2056   | 0.2992  | 0.3614  |
| 8        | H    | 0.0767   | 0.0742  | 0.0577  |
| 9        | H    | 0.0880   | 0.0817  | 0.0690  |
| 10       | H    | 0.0900   | 0.0863  | 0.0711  |
| 11       | H    | 0.0854   | 0.0805  | 0.0675  |
| 12       | H    | 0.0747   | 0.0626  | 0.0567  |
| 13       | H    | 0.1053   | 0.0747  | 0.0872  |

# Gauche-1,2-propanediol

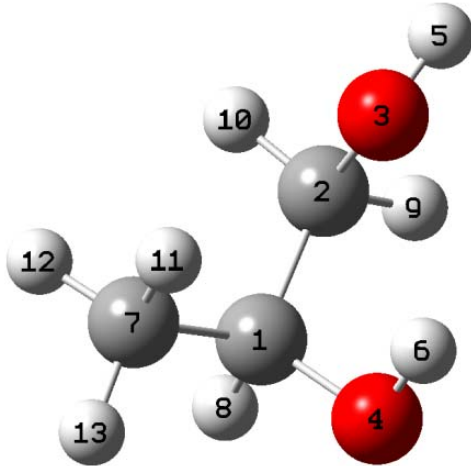

| ATOM NO. | TYPE | MULLIKEN | DPPC    | CM2     |
|----------|------|----------|---------|---------|
| 1        | C    | 0.0332   | 0.1224  | 0.0933  |
| 2        | C    | -0.0574  | 0.0053  | 0.0212  |
| 3        | O    | -0.3378  | -0.4571 | -0.5361 |
| 4        | O    | -0.3256  | -0.4956 | -0.5225 |
| 5        | H    | 0.2054   | 0.2962  | 0.3618  |
| 6        | H    | 0.213    | 0.3197  | 0.3671  |
| 7        | C    | -0.2456  | -0.2411 | -0.1883 |
| 8        | H    | 0.1119   | 0.0762  | 0.0941  |
| 9        | H    | 0.0744   | 0.0739  | 0.0562  |
| 10       | H    | 0.07     | 0.0602  | 0.0519  |
| 11       | H    | 0.0912   | 0.0840  | 0.0723  |
| 12       | H    | 0.0785   | 0.0731  | 0.0595  |
| 13       | H    | 0.0886   | 0.0828  | 0.0696  |

# Gauche-propannol

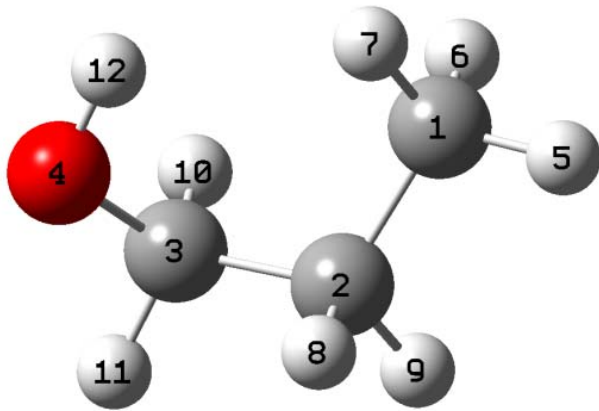

| ATOM NO. | TYPE | MULLIKEN | DPPC    | CM2     |
|----------|------|----------|---------|---------|
| 1        | C    | -0.2151  | -0.2046 | -0.1580 |
| 2        | C    | -0.2020  | -0.1810 | -0.1643 |
| 3        | C    | -0.0223  | 0.0556  | 0.0563  |
| 4        | O    | -0.3262  | -0.4891 | -0.5251 |
| 5        | H    | 0.0792   | 0.0738  | 0.0601  |
| 6        | H    | 0.0737   | 0.0692  | 0.0546  |
| 7        | H    | 0.0688   | 0.0676  | 0.0498  |
| 8        | H    | 0.0946   | 0.0891  | 0.0760  |
| 9        | H    | 0.0881   | 0.0799  | 0.0695  |
| 10       | H    | 0.0612   | 0.0544  | 0.0431  |
| 11       | H    | 0.1034   | 0.0760  | 0.0852  |
| 12       | H    | 0.1964   | 0.3091  | 0.3526  |

# Aldehydes and ketones

# 2-butanone

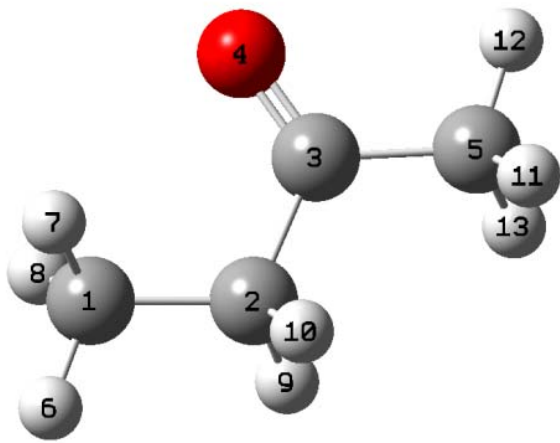

| ATOM NO. | TYPE | MULLIKEN | DPPC    | CM2     |
|----------|------|----------|---------|---------|
| 1        | C    | -0.2058  | -0.1979 | -0.1488 |
| 2        | C    | -0.2109  | -0.1970 | -0.1734 |
| 3        | C    | 0.2233   | 0.3489  | 0.3485  |
| 4        | O    | -0.2897  | -0.3793 | -0.4169 |
| 5        | C    | -0.2732  | -0.2738 | -0.2161 |
| 6        | H    | 0.0739   | 0.0653  | 0.0549  |
| 7        | H    | 0.0868   | 0.0808  | 0.0678  |
| 8        | H    | 0.0866   | 0.0806  | 0.0676  |
| 9        | H    | 0.1014   | 0.0926  | 0.0832  |
| 10       | H    | 0.1016   | 0.0928  | 0.0834  |
| 11       | H    | 0.0995   | 0.0942  | 0.0809  |
| 12       | H    | 0.1069   | 0.0986  | 0.088   |
| 13       | H    | 0.0995   | 0.0942  | 0.0809  |

# 3-cyclopentenone

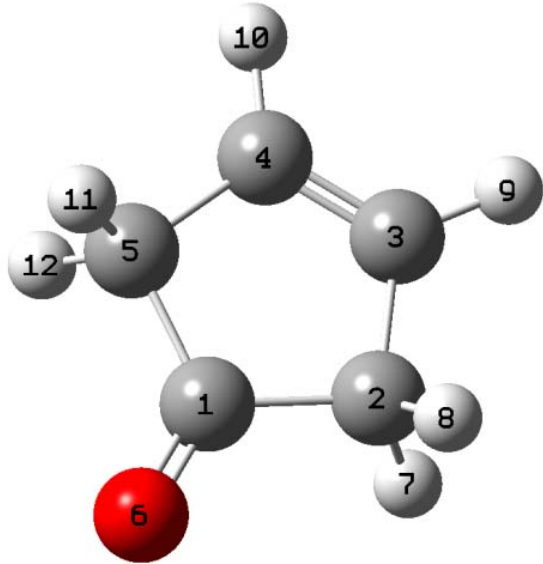

| ATOM NO. | TYPE | MULLIKEN | DPPC    | CM2     |
|----------|------|----------|---------|---------|
| 1        | C    | 0.2293   | 0.3508  | 0.3558  |
| 2        | C    | -0.1973  | -0.1899 | -0.1606 |
| 3        | C    | -0.1703  | -0.1337 | -0.1523 |
| 4        | C    | -0.1703  | -0.1337 | -0.1524 |
| 5        | C    | -0.1973  | -0.1899 | -0.1605 |
| 6        | O    | -0.2812  | -0.3731 | -0.41   |
| 7        | H    | 0.1242   | 0.1100  | 0.1063  |
| 8        | H    | 0.1242   | 0.1099  | 0.1064  |
| 9        | H    | 0.1451   | 0.1149  | 0.1273  |
| 10       | H    | 0.1451   | 0.1149  | 0.1273  |
| 11       | H    | 0.1242   | 0.1100  | 0.1064  |
| 12       | H    | 0.1242   | 0.1100  | 0.1063  |



# 4-cyclopentene-1,3-dione

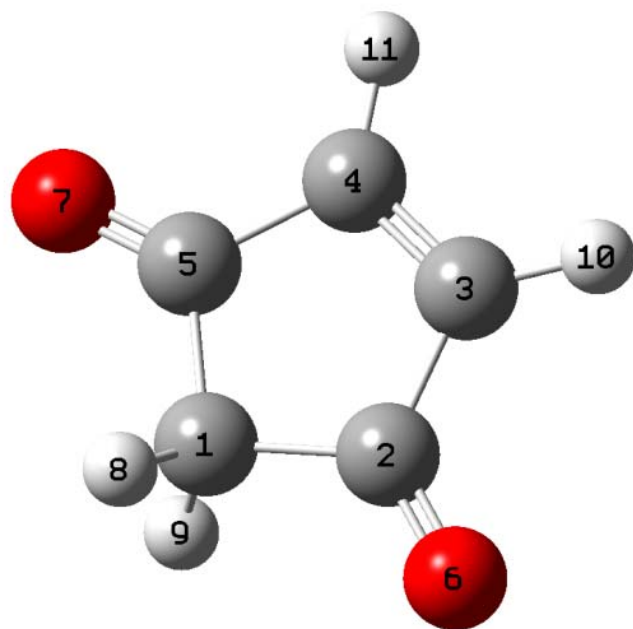

| ATOM NO. | TYPE | MULLIKEN | DPPC    | CM2     |
|----------|------|----------|---------|---------|
| 1        | C    | -0.2777  | -0.2837 | -0.2402 |
| 2        | C    | 0.2448   | 0.3642  | 0.3718  |
| 3        | C    | -0.1739  | -0.1489 | -0.1546 |
| 4        | C    | -0.1739  | -0.1490 | -0.1547 |
| 5        | C    | 0.2448   | 0.3643  | 0.3718  |
| 6        | O    | -0.2512  | -0.3480 | -0.381  |
| 7        | O    | -0.2512  | -0.3481 | -0.381  |
| 8        | H    | 0.1492   | 0.1358  | 0.1315  |
| 9        | H    | 0.1492   | 0.1358  | 0.1315  |
| 10       | H    | 0.17     | 0.1388  | 0.1524  |
| 11       | H    | 0.1699   | 0.1388  | 0.1523  |

# acetaldehyde

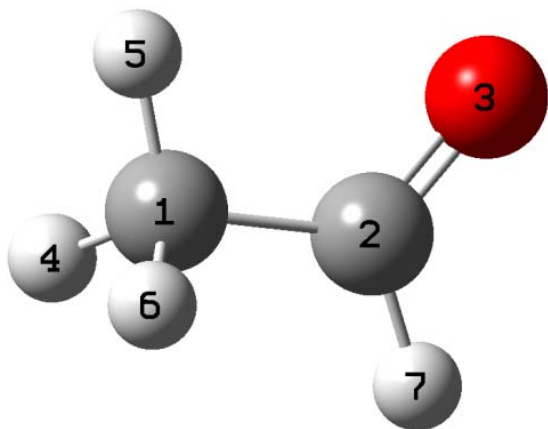

| ATOMNO. | TYPE | MULLIKEN | DPPC    | CM2     |
|---------|------|----------|---------|---------|
| 1       | C    | -0.2893  | -0.2847 | -0.2324 |
| 2       | C    | 0.1804   | 0.2906  | 0.3256  |
| 3       | O    | -0.2867  | -0.3639 | -0.4169 |
| 4       | H    | 0.1028   | 0.0985  | 0.0843  |
| 5       | H    | 0.107    | 0.1027  | 0.0881  |
| 6       | H    | 0.1026   | 0.0982  | 0.0841  |
| 7       | H    | 0.0832   | 0.0586  | 0.0672  |

# acetone

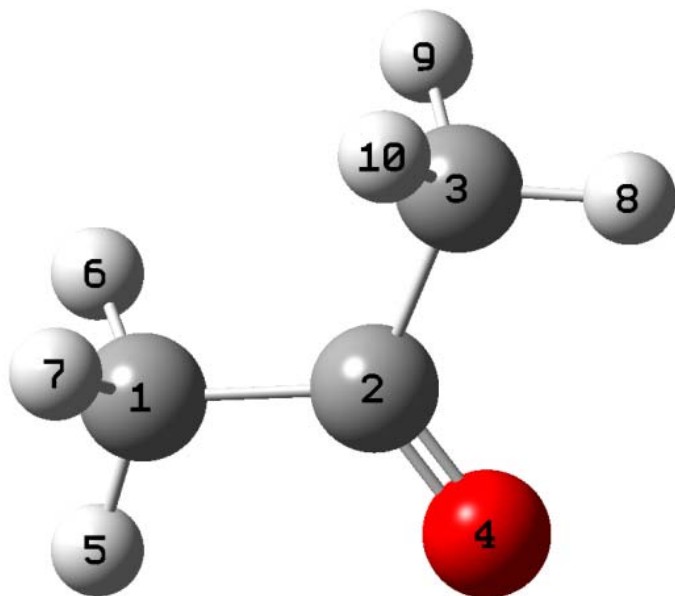

| ATOM NO. | TYPE | MULLIKEN | TOTAL   | CM2     |
|----------|------|----------|---------|---------|
| 1        | C    | -0.2724  | -0.2729 | -0.2154 |
| 2        | C    | 0.2241   | 0.3523  | 0.3489  |
| 3        | C    | -0.2724  | -0.2729 | -0.2154 |
| 4        | O    | -0.2922  | -0.3815 | -0.4190 |
| 5        | H    | 0.107    | 0.0987  | 0.0881  |
| 6        | H    | 0.0998   | 0.0945  | 0.0813  |
| 7        | H    | 0.0997   | 0.0943  | 0.0811  |
| 8        | H    | 0.107    | 0.0987  | 0.0880  |
| 9        | H    | 0.0998   | 0.0945  | 0.0812  |
| 10       | H    | 0.0998   | 0.0944  | 0.0812  |

# Cis-propenal

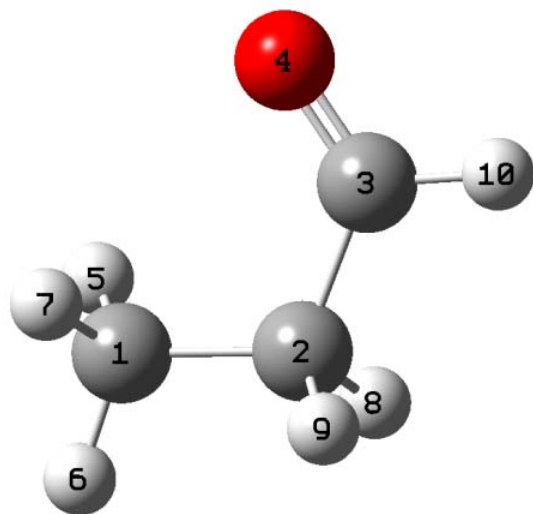

| ATOM NO. | TYPE | MULLIKEN | DPPC    | CM2     |
|----------|------|----------|---------|---------|
| 1        | C    | -0.2063  | -0.1970 | -0.1493 |
| 2        | C    | -0.2276  | -0.2078 | -0.1903 |
| 3        | C    | 0.18     | 0.2897  | 0.3256  |
| 4        | O    | -0.2844  | -0.3625 | -0.415  |
| 5        | H    | 0.0863   | 0.0807  | 0.0673  |
| 6        | H    | 0.0751   | 0.0668  | 0.0561  |
| 7        | H    | 0.0864   | 0.0808  | 0.0674  |
| 8        | H    | 0.1043   | 0.0966  | 0.0862  |
| 9        | H    | 0.1043   | 0.0966  | 0.0862  |
| 10       | H    | 0.0818   | 0.0560  | 0.0658  |

# Cyclobutane-1,2-dione

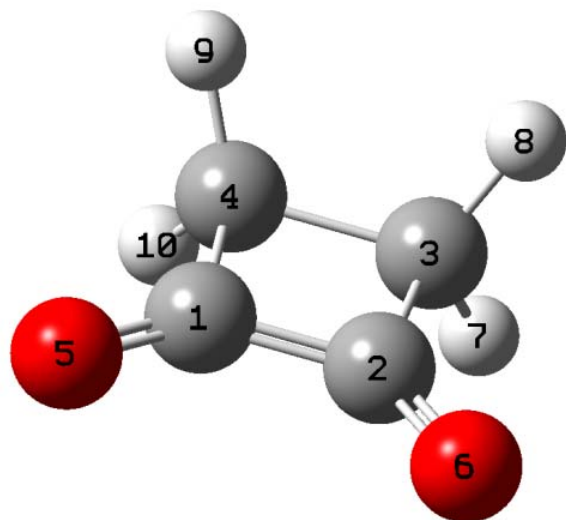

| ATOM NO. | TYPE | MULLIKEN | DPPC    | CM2     |
|----------|------|----------|---------|---------|
| 1        | C    | 0.1788   | 0.2897  | 0.3134  |
| 2        | C    | 0.1788   | 0.2897  | 0.3135  |
| 3        | C    | -0.2231  | -0.2177 | -0.1854 |
| 4        | C    | -0.2233  | -0.2179 | -0.1856 |
| 5        | O    | -0.2081  | -0.3007 | -0.3442 |
| 6        | O    | -0.2081  | -0.3007 | -0.3442 |
| 7        | H    | 0.1262   | 0.1144  | 0.1081  |
| 8        | H    | 0.1263   | 0.1144  | 0.1082  |
| 9        | H    | 0.1263   | 0.1144  | 0.1081  |
| 10       | H    | 0.1262   | 0.1144  | 0.1081  |

# cyclobutanone

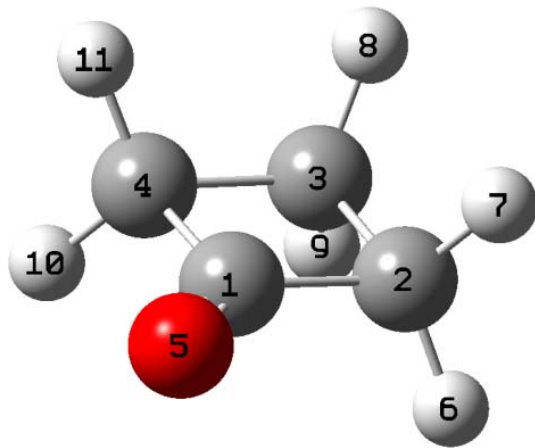

| ATOM NO. | TYPE | MULLIKEN | DPPC    | CM2     |
|----------|------|----------|---------|---------|
| 1        | C    | 0.2286   | 0.3576  | 0.3575  |
| 2        | C    | -0.2306  | -0.2226 | -0.1929 |
| 3        | C    | -0.1679  | -0.1529 | -0.1304 |
| 4        | C    | -0.2306  | -0.2226 | -0.1929 |
| 5        | O    | -0.2606  | -0.3590 | -0.3920 |
| 6        | H    | 0.1169   | 0.1079  | 0.0987  |
| 7        | H    | 0.117    | 0.1079  | 0.0987  |
| 8        | H    | 0.0966   | 0.0841  | 0.0780  |
| 9        | H    | 0.0966   | 0.0841  | 0.0779  |
| 10       | H    | 0.1169   | 0.1079  | 0.0987  |
| 11       | H    | 0.117    | 0.1079  | 0.0987  |

# cyclopentadienone

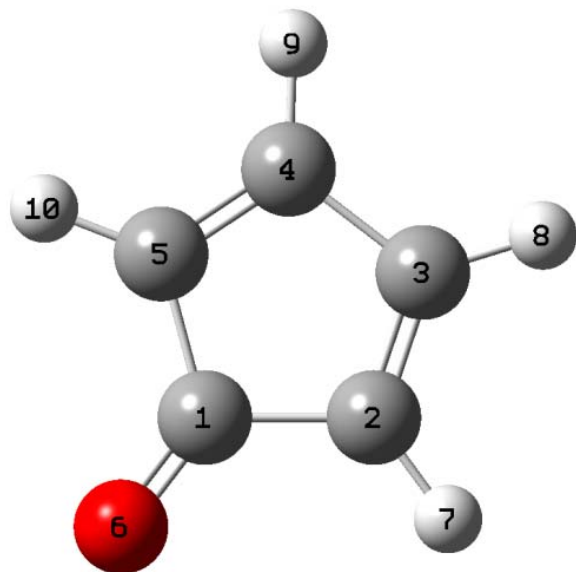

| ATOM NO. | TYPE | MULLIKEN | DPPC    | CM2     |
|----------|------|----------|---------|---------|
| 1        | C    | 0.2659   | 0.3842  | 0.3936  |
| 2        | C    | -0.2264  | -0.2072 | -0.2078 |
| 3        | C    | -0.1073  | -0.0717 | -0.0888 |
| 4        | C    | -0.1073  | -0.0717 | -0.0888 |
| 5        | C    | -0.2264  | -0.2072 | -0.2078 |
| 6        | O    | -0.2372  | -0.3350 | -0.3681 |
| 7        | H    | 0.1662   | 0.1343  | 0.1485  |
| 8        | H    | 0.1532   | 0.1200  | 0.1354  |
| 9        | H    | 0.1531   | 0.1200  | 0.1354  |
| 10       | H    | 0.1662   | 0.1343  | 0.1485  |

# cyclopentanone

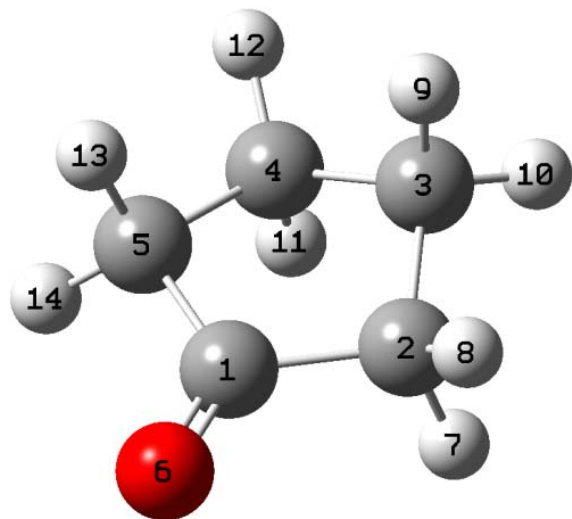

| ATOM NO. | TYPE | MULLIKEN | DPPC    | CM2     |
|----------|------|----------|---------|---------|
| 1        | C    | 0.2338   | 0.3585  | 0.3591  |
| 2        | C    | -0.2186  | -0.2094 | -0.1814 |
| 3        | C    | -0.1578  | -0.1399 | -0.1203 |
| 4        | C    | -0.1579  | -0.1399 | -0.1204 |
| 5        | C    | -0.2186  | -0.2093 | -0.1813 |
| 6        | O    | -0.2903  | -0.3809 | -0.4179 |
| 7        | H    | 0.1154   | 0.1049  | 0.0971  |
| 8        | H    | 0.1157   | 0.1046  | 0.0975  |
| 9        | H    | 0.0864   | 0.0754  | 0.0675  |
| 10       | H    | 0.0872   | 0.0756  | 0.0689  |
| 11       | H    | 0.0863   | 0.0753  | 0.0674  |
| 12       | H    | 0.0873   | 0.0756  | 0.0688  |
| 13       | H    | 0.1154   | 0.1049  | 0.0973  |
| 14       | H    | 0.1157   | 0.1046  | 0.0975  |



# E-2-butenal

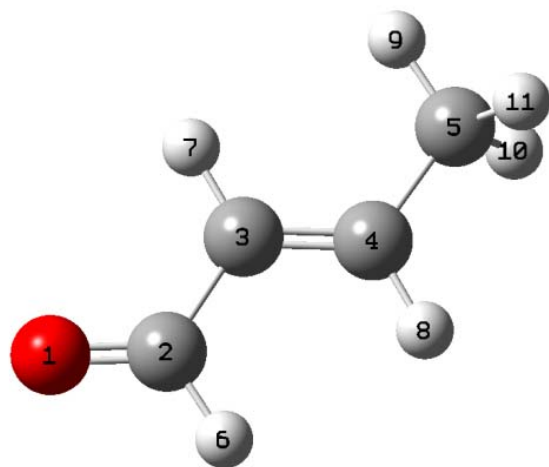

| ATOM NO. | TYPE | MULLIKEN | DPPC    | CM2     |
|----------|------|----------|---------|---------|
| 1        | O    | -0.287   | -0.3681 | -0.4155 |
| 2        | C    | 0.2092   | 0.3101  | 0.3518  |
| 3        | C    | -0.2596  | -0.2301 | -0.2408 |
| 4        | C    | -0.0885  | -0.0450 | -0.0697 |
| 5        | C    | -0.2029  | -0.1964 | -0.1469 |
| 6        | H    | 0.083    | 0.0531  | 0.0669  |
| 7        | H    | 0.1487   | 0.1273  | 0.1309  |
| 8        | H    | 0.1218   | 0.1009  | 0.1039  |
| 9        | H    | 0.0887   | 0.0803  | 0.0697  |
| 10       | H    | 0.0934   | 0.0841  | 0.0749  |
| 11       | H    | 0.0932   | 0.0838  | 0.0747  |

# cyclopropanone

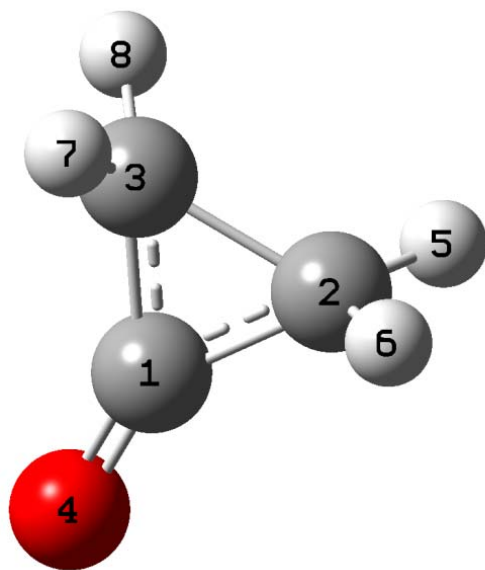

| ATOM NO. | TYPE | MULLIKEN | DPPC    | CM2     |
|----------|------|----------|---------|---------|
| 1        | C    | 0.224    | 0.3654  | 0.3542  |
| 2        | C    | -0.2723  | -0.2521 | -0.2348 |
| 3        | C    | -0.2724  | -0.2522 | -0.2349 |
| 4        | O    | -0.2128  | -0.3287 | -0.3461 |
| 5        | H    | 0.1334   | 0.1169  | 0.1154  |
| 6        | H    | 0.1334   | 0.1169  | 0.1154  |
| 7        | H    | 0.1334   | 0.1169  | 0.1154  |
| 8        | H    | 0.1334   | 0.1169  | 0.1154  |

# formaldehyde

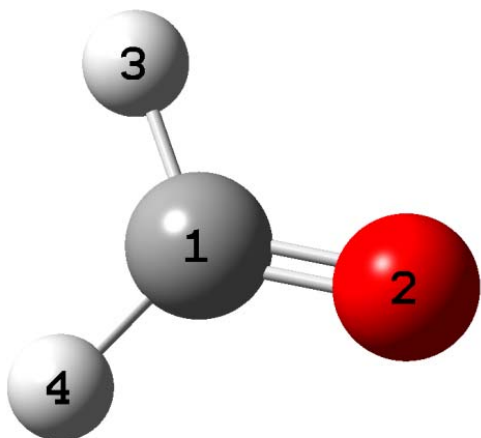

| ATOM NO. | TYPE | MULLIKEN | TOTAL   | CM2     |
|----------|------|----------|---------|---------|
| 1        | C    | 0.1384   | 0.2285  | 0.3054  |
| 2        | O    | -0.2759  | -0.3395 | -0.4106 |
| 3        | H    | 0.0688   | 0.0555  | 0.0526  |
| 4        | H    | 0.0687   | 0.0555  | 0.0525  |

# Ketene

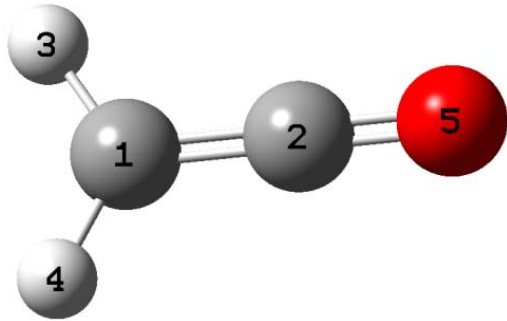

| ATOM NO. | TYPE | MULLIKEN | DPPC    | CM2     |
|----------|------|----------|---------|---------|
| 1        | C    | -0.4414  | -0.4446 | -0.4030 |
| 2        | C    | 0.2559   | 0.4344  | 0.3937  |
| 3        | H    | 0.1764   | 0.1423  | 0.1595  |
| 4        | H    | 0.1764   | 0.1423  | 0.1595  |
| 5        | O    | -0.1673  | -0.2743 | -0.3097 |

# methylketene

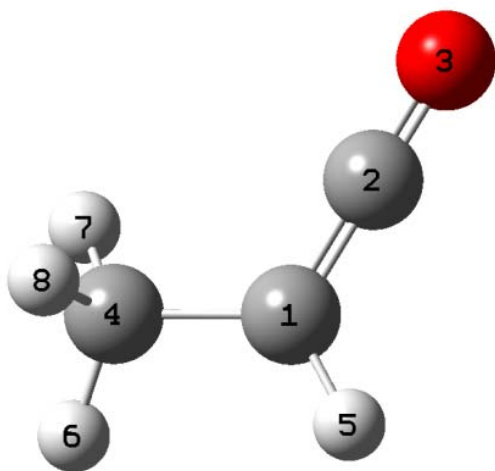

| ATOM NO. | TYPE | MULLIKEN | TOTAL   | CM2     |
|----------|------|----------|---------|---------|
| 1        | C    | -0.3703  | -0.3785 | -0.3493 |
| 2        | C    | 0.2492   | 0.3924  | 0.3881  |
| 3        | O    | -0.1611  | -0.2563 | -0.3045 |
| 4        | C    | -0.1284  | -0.1539 | -0.0716 |
| 5        | H    | 0.1761   | 0.1595  | 0.1594  |
| 6        | H    | 0.08     | 0.0631  | 0.0613  |
| 7        | H    | 0.0737   | 0.1115  | 0.0546  |
| 8        | H    | 0.0807   | 0.0622  | 0.062   |

# Trans-propanal

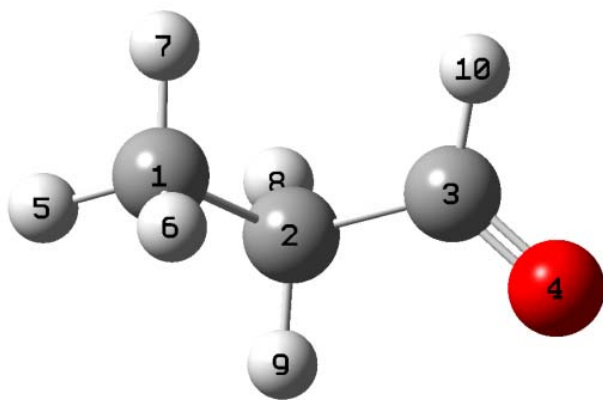

| ATOM NO. | TYPE | MULLIKEN | DPPC    | CM2     |
|----------|------|----------|---------|---------|
| 1        | C    | -0.2054  | -0.1963 | -0.1525 |
| 2        | C    | -0.2304  | -0.2167 | -0.1957 |
| 3        | C    | 0.1867   | 0.2953  | 0.3279  |
| 4        | O    | -0.2794  | -0.3567 | -0.4189 |
| 5        | H    | 0.0823   | 0.0756  | 0.064   |
| 6        | H    | 0.08     | 0.0748  | 0.0604  |
| 7        | H    | 0.0744   | 0.0697  | 0.0565  |
| 8        | H    | 0.1043   | 0.0981  | 0.0928  |
| 9        | H    | 0.1088   | 0.1022  | 0.0951  |
| 10       | H    | 0.0788   | 0.0540  | 0.0703  |

# Acids

# acetic acid

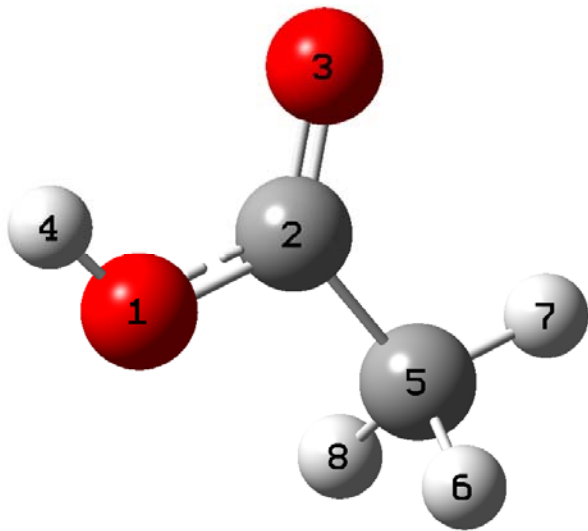

| ATOM NO. | TYPE | MULLIKEN | DPPC    | CM2     |
|----------|------|----------|---------|---------|
| 1        | O    | -0.3212  | -0.4873 | -0.5134 |
| 2        | C    | 0.3058   | 0.5052  | 0.4634  |
| 3        | O    | -0.3614  | -0.4463 | -0.4746 |
| 4        | H    | 0.2433   | 0.3501  | 0.3899  |
| 5        | C    | -0.2174  | -0.2259 | -0.1605 |
| 6        | H    | 0.1169   | 0.1022  | 0.0984  |
| 7        | H    | 0.1167   | 0.0989  | 0.0980  |
| 8        | H    | 0.1172   | 0.1030  | 0.0988  |



# Acetoacetic acid

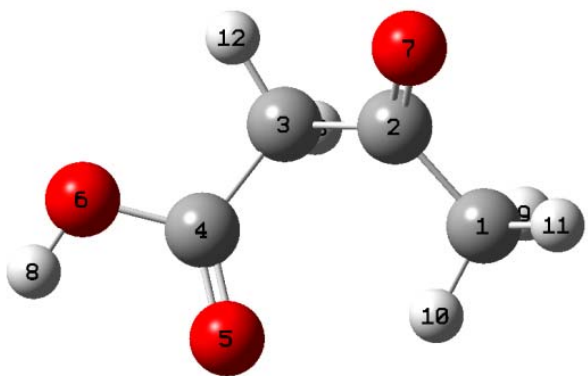

| ATOM NO. | TYPE | MULLIKEN | DPPC    | CM2     |
|----------|------|----------|---------|---------|
| 1        | C    | -0.2775  | -0.2814 | -0.2211 |
| 2        | C    | 0.2382   | 0.3604  | 0.3653  |
| 3        | C    | -0.2229  | -0.2297 | -0.1848 |
| 4        | C    | 0.3193   | 0.5171  | 0.4775  |
| 5        | O    | -0.3612  | -0.4503 | -0.474  |
| 6        | O    | -0.3084  | -0.4715 | -0.5009 |
| 7        | O    | -0.2724  | -0.3638 | -0.4015 |
| 8        | H    | 0.2481   | 0.3516  | 0.394   |
| 9        | H    | 0.1042   | 0.0987  | 0.0858  |
| 10       | H    | 0.1329   | 0.1198  | 0.1147  |
| 11       | H    | 0.1116   | 0.1025  | 0.0928  |
| 12       | H    | 0.1486   | 0.1229  | 0.1304  |
| 13       | H    | 0.1394   | 0.1237  | 0.1217  |

# Cis-acrylic acid

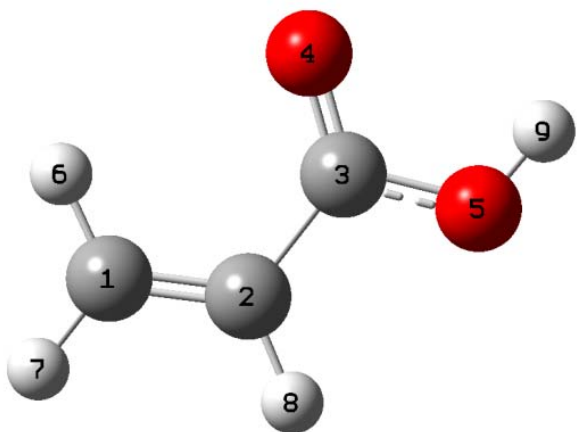

| ATOM NO. | TYPE | MULLIKEN | DPPC    | CM2     |
|----------|------|----------|---------|---------|
| 1        | C    | -0.1263  | -0.1115 | -0.0892 |
| 2        | C    | -0.1932  | -0.1695 | -0.1743 |
| 3        | C    | 0.3344   | 0.5238  | 0.4899  |
| 4        | O    | -0.3651  | -0.4551 | -0.4766 |
| 5        | O    | -0.314   | -0.4752 | -0.5068 |
| 6        | H    | 0.1377   | 0.1200  | 0.1196  |
| 7        | H    | 0.1264   | 0.1077  | 0.1082  |
| 8        | H    | 0.156    | 0.1148  | 0.1383  |
| 9        | H    | 0.2441   | 0.3450  | 0.3910  |

# Cis-formicacid

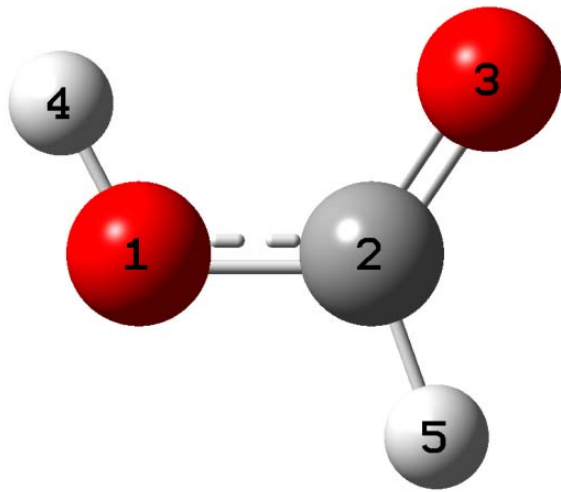

| ATOM NO. | TYPE | MULLIKEN | DPPC    | CM2     |
|----------|------|----------|---------|---------|
| 1        | O    | -0.3245  | -0.4865 | -0.5168 |
| 2        | C    | 0.2605   | 0.4286  | 0.4386  |
| 3        | O    | -0.3571  | -0.4280 | -0.4732 |
| 4        | H    | 0.2418   | 0.3542  | 0.3877  |
| 5        | H    | 0.1793   | 0.1317  | 0.1638  |

# Formylformic acid

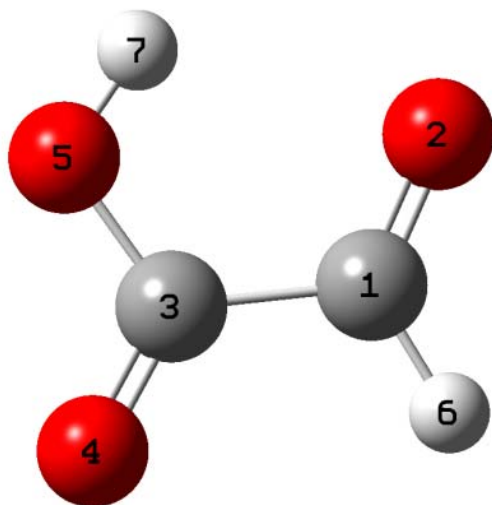

| ATOM NO. | TYPE | MULLIKEN | DPPC    | CM2     |
|----------|------|----------|---------|---------|
| 1        | C    | 0.1572   | 0.2427  | 0.3076  |
| 2        | O    | -0.2453  | -0.3189 | -0.3792 |
| 3        | C    | 0.2299   | 0.4192  | 0.3956  |
| 4        | O    | -0.2647  | -0.3655 | -0.3838 |
| 5        | O    | -0.2684  | -0.4502 | -0.4641 |
| 6        | H    | 0.1461   | 0.1108  | 0.1301  |
| 7        | H    | 0.2451   | 0.3619  | 0.3937  |

# Methoxyethanoic acid

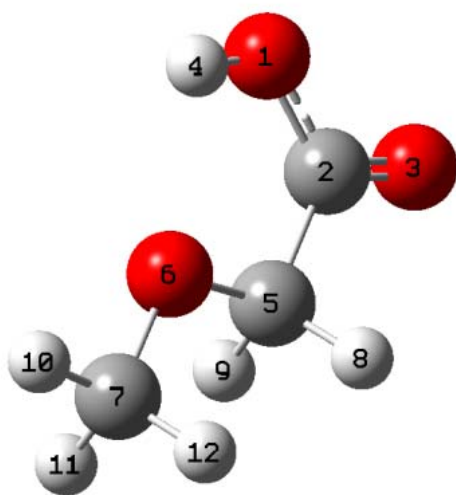

| ATOM NO. | TYPE | MULLIKEN | DPPC    | CM2     |
|----------|------|----------|---------|---------|
| 1        | O    | -0.2806  | -0.4656 | -0.4753 |
| 2        | C    | 0.3039   | 0.4965  | 0.4661  |
| 3        | O    | -0.3062  | -0.4136 | -0.4232 |
| 4        | H    | 0.2476   | 0.3434  | 0.3952  |
| 5        | C    | -0.0699  | -0.0225 | 0.008   |
| 6        | O    | -0.3003  | -0.3175 | -0.3813 |
| 7        | C    | -0.0665  | -0.0259 | 0.0292  |
| 8        | H    | 0.112    | 0.0969  | 0.0943  |
| 9        | H    | 0.1119   | 0.0973  | 0.0942  |
| 10       | H    | 0.1084   | 0.0864  | 0.0901  |
| 11       | H    | 0.0698   | 0.0624  | 0.0513  |
| 12       | H    | 0.0699   | 0.0621  | 0.0514  |

# Propanoic acid

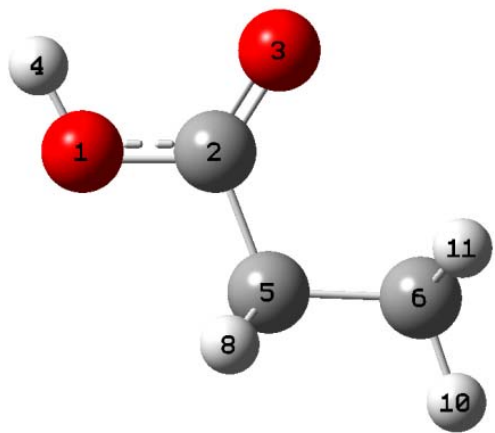

| ATOM NO. | TYPE | MULLIKEN | DPPC    | CM2     |
|----------|------|----------|---------|---------|
| 1        | O    | -0.3232  | -0.4866 | -0.5153 |
| 2        | C    | 0.3039   | 0.4995  | 0.4617  |
| 3        | O    | -0.3596  | -0.4450 | -0.4732 |
| 4        | H    | 0.2428   | 0.3483  | 0.3894  |
| 5        | C    | -0.1548  | -0.1498 | -0.1173 |
| 6        | C    | -0.2118  | -0.2079 | -0.1548 |
| 7        | H    | 0.1189   | 0.1002  | 0.1007  |
| 8        | H    | 0.1189   | 0.1003  | 0.1008  |
| 9        | H    | 0.0911   | 0.0843  | 0.0721  |
| 10       | H    | 0.0826   | 0.0723  | 0.0636  |
| 11       | H    | 0.0913   | 0.0845  | 0.0724  |

# Trans-acrylic acid

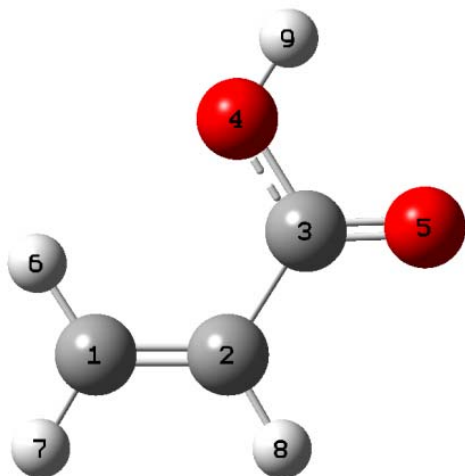

| ATOM NO. | TYPE | MULLIKEN | DPPC    | CM2     |
|----------|------|----------|---------|---------|
| 1        | C    | -0.1618  | -0.1422 | -0.0876 |
| 2        | C    | -0.2201  | -0.1917 | -0.1747 |
| 3        | C    | 0.3226   | 0.5235  | 0.4914  |
| 4        | O    | -0.2885  | -0.4823 | -0.5134 |
| 5        | O    | -0.2902  | -0.3978 | -0.4715 |
| 6        | H    | 0.1188   | 0.1132  | 0.1184  |
| 7        | H    | 0.1332   | 0.1101  | 0.1064  |
| 8        | H    | 0.1637   | 0.1318  | 0.1393  |
| 9        | H    | 0.2224   | 0.3353  | 0.3917  |

# Trans-formicacid

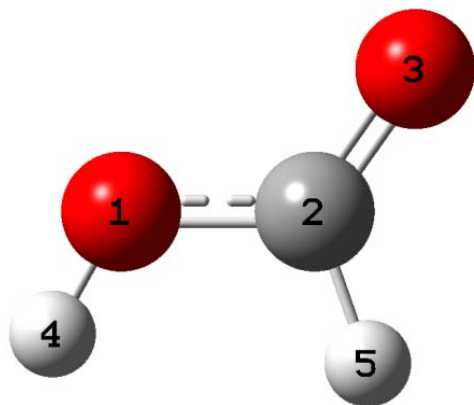

| ATOM NO. | TYPE | MULLIKEN | DPPC    | CM2     |
|----------|------|----------|---------|---------|
| 1        | O    | -0.3014  | -0.4555 | -0.4993 |
| 2        | C    | 0.2459   | 0.4055  | 0.4276  |
| 3        | O    | -0.2939  | -0.3857 | -0.4155 |
| 4        | H    | 0.2231   | 0.3291  | 0.3762  |
| 5        | H    | 0.1263   | 0.1066  | 0.111   |



Ester and lactone

# 2-furanone

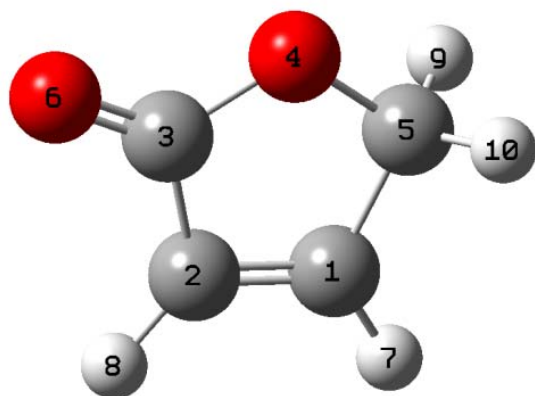

| ATOM NO. | TYPE | MULLIKEN | DPPC    | CM2     |
|----------|------|----------|---------|---------|
| 1        | C    | -0.1424  | -0.1041 | -0.1238 |
| 2        | C    | -0.2077  | -0.1839 | -0.1885 |
| 3        | C    | 0.3164   | 0.5022  | 0.4758  |
| 4        | O    | -0.2547  | -0.3454 | -0.3367 |
| 5        | C    | -0.0266  | 0.0402  | 0.049   |
| 6        | O    | -0.2758  | -0.3855 | -0.3962 |
| 7        | H    | 0.1656   | 0.1345  | 0.1479  |
| 8        | H    | 0.1798   | 0.1416  | 0.1624  |
| 9        | H    | 0.1228   | 0.1003  | 0.1051  |
| 10       | H    | 0.1227   | 0.1002  | 0.1051  |

# 3-oxetanone

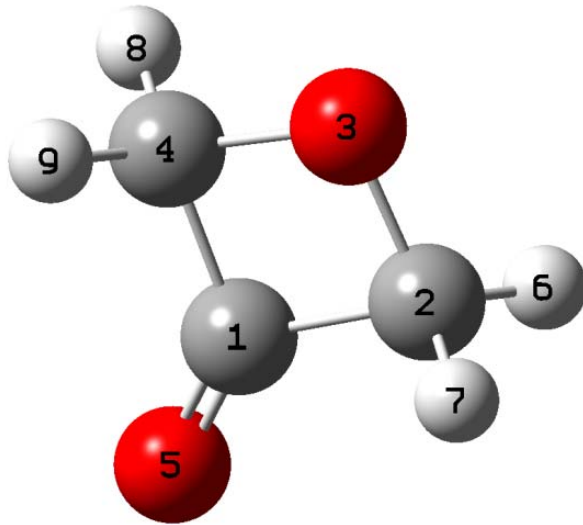

| ATOM NO. | TYPE | MULLIKEN | DPPC    | CM2     |
|----------|------|----------|---------|---------|
| 1        | C    | 0.1985   | 0.3204  | 0.3306  |
| 2        | C    | -0.0972  | -0.0513 | -0.0199 |
| 3        | O    | -0.2654  | -0.3302 | -0.3467 |
| 4        | C    | -0.0972  | -0.0513 | -0.0199 |
| 5        | O    | -0.2324  | -0.3294 | -0.3668 |
| 6        | H    | 0.1234   | 0.1105  | 0.1056  |
| 7        | H    | 0.1235   | 0.1105  | 0.1057  |
| 8        | H    | 0.1234   | 0.1105  | 0.1056  |
| 9        | H    | 0.1235   | 0.1105  | 0.1057  |

# Beta-propiolactone

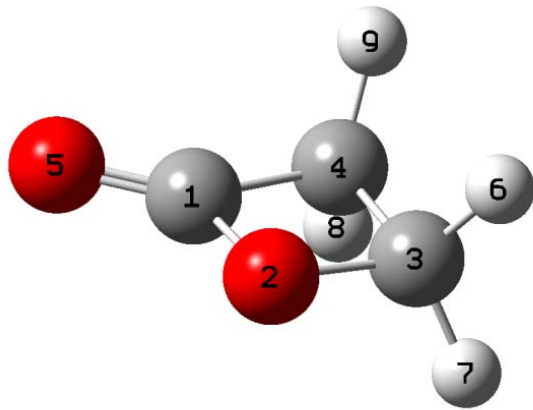

| ATOM NO. | TYPE | MULLIKEN | DPPC    | CM2     |
|----------|------|----------|---------|---------|
| 1        | C    | 0.3001   | 0.4856  | 0.4641  |
| 2        | O    | -0.2653  | -0.3274 | -0.3468 |
| 3        | C    | -0.0409  | 0.0082  | 0.0353  |
| 4        | C    | -0.2235  | -0.2230 | -0.1851 |
| 5        | O    | -0.2596  | -0.3693 | -0.384  |
| 6        | H    | 0.1135   | 0.0947  | 0.0953  |
| 7        | H    | 0.1135   | 0.0947  | 0.0953  |
| 8        | H    | 0.1311   | 0.1183  | 0.1129  |
| 9        | H    | 0.1311   | 0.1183  | 0.1129  |

# Cis-ethylformate

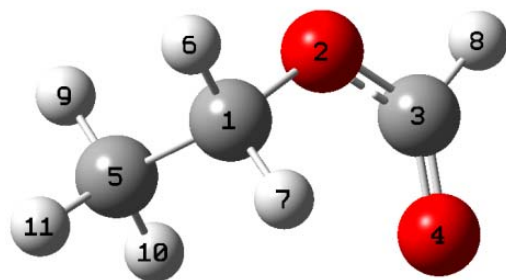

| ATOM NO. | TYPE | MULLIKEN | DPPC    | CM2     |
|----------|------|----------|---------|---------|
| 1        | C    | -0.0158  | 0.0597  | 0.0582  |
| 2        | O    | -0.2876  | -0.3543 | -0.3704 |
| 3        | C    | 0.2577   | 0.4223  | 0.4346  |
| 4        | O    | -0.3517  | -0.4274 | -0.4684 |
| 5        | C    | -0.2442  | -0.2366 | -0.1871 |
| 6        | H    | 0.1048   | 0.0720  | 0.0868  |
| 7        | H    | 0.0986   | 0.0913  | 0.0804  |
| 8        | H    | 0.1714   | 0.1215  | 0.156   |
| 9        | H    | 0.0848   | 0.0813  | 0.0658  |
| 10       | H    | 0.0952   | 0.0914  | 0.0763  |
| 11       | H    | 0.0866   | 0.0788  | 0.0678  |

# Gamma-butyrolactone

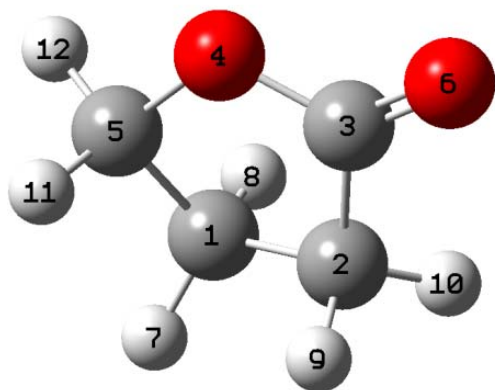

| ATOM NO. | TYPE | MULLIKEN | DPPC    | CM2     |
|----------|------|----------|---------|---------|
| 1        | C    | -0.1936  | -0.1746 | -0.156  |
| 2        | C    | -0.2011  | -0.1916 | -0.163  |
| 3        | C    | 0.2976   | 0.4924  | 0.4584  |
| 4        | O    | -0.2508  | -0.3442 | -0.3335 |
| 5        | C    | -0.0308  | 0.0426  | 0.0454  |
| 6        | O    | -0.2893  | -0.3947 | -0.4093 |
| 7        | H    | 0.1027   | 0.0901  | 0.0841  |
| 8        | H    | 0.1027   | 0.0901  | 0.084   |
| 9        | H    | 0.1284   | 0.1119  | 0.1103  |
| 10       | H    | 0.1284   | 0.1119  | 0.1102  |
| 11       | H    | 0.1029   | 0.0831  | 0.0847  |
| 12       | H    | 0.1028   | 0.0830  | 0.0846  |

# methyformate

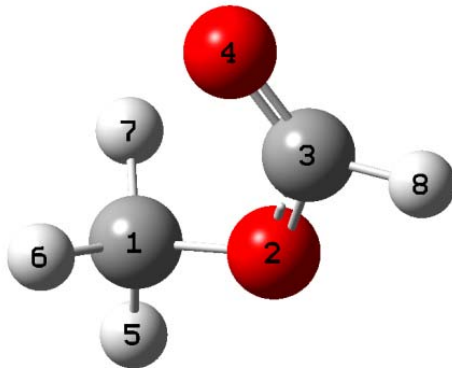

| ATOM NO. | TYPE | MULLIKEN | DPPC    | CM2     |
|----------|------|----------|---------|---------|
| 1        | C    | -0.0678  | -0.0104 | 0.0265  |
| 2        | O    | -0.2859  | -0.3477 | -0.3693 |
| 3        | C    | 0.2546   | 0.4172  | 0.4317  |
| 4        | O    | -0.3481  | -0.4237 | -0.4652 |
| 5        | H    | 0.1032   | 0.0742  | 0.0847  |
| 6        | H    | 0.0851   | 0.0823  | 0.0665  |
| 7        | H    | 0.0849   | 0.0820  | 0.0663  |
| 8        | H    | 0.1742   | 0.1262  | 0.1587  |

# methylacetate

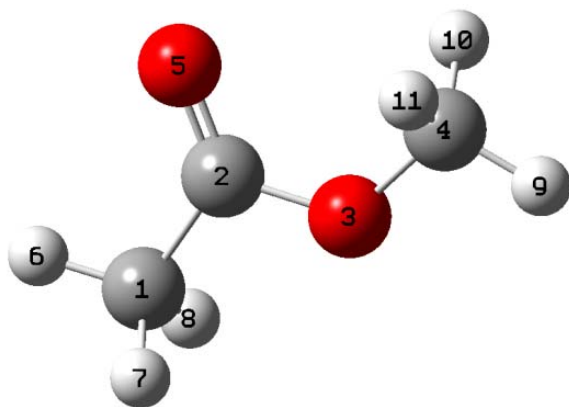

| ATOM NO. | TYPE | MULLIKEN | DPPC    | CM2     |
|----------|------|----------|---------|---------|
| 1        | C    | -0.2176  | -0.2264 | -0.1606 |
| 2        | C    | 0.2995   | 0.4915  | 0.4563  |
| 3        | O    | -0.2825  | -0.3513 | -0.3651 |
| 4        | C    | -0.0634  | -0.0073 | 0.031   |
| 5        | O    | -0.3516  | -0.4402 | -0.466  |
| 6        | H    | 0.1153   | 0.0974  | 0.0966  |
| 7        | H    | 0.1152   | 0.1015  | 0.0967  |
| 8        | H    | 0.1152   | 0.1014  | 0.0967  |
| 9        | H    | 0.1013   | 0.0724  | 0.0829  |
| 10       | H    | 0.0845   | 0.0807  | 0.0659  |
| 11       | H    | 0.0842   | 0.0804  | 0.0657  |



# Trans-ethylformate

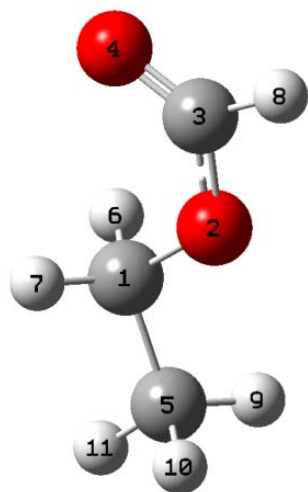

| ATOM NO. | TYPE | MULLIKEN | DPPC    | CM2     |
|----------|------|----------|---------|---------|
| 1        | C    | -0.0153  | 0.0508  | 0.0586  |
| 2        | O    | -0.2884  | -0.3529 | -0.3712 |
| 3        | C    | 0.2569   | 0.4186  | 0.434   |
| 4        | O    | -0.352   | -0.4286 | -0.4685 |
| 5        | C    | -0.2181  | -0.2179 | -0.1612 |
| 6        | H    | 0.0908   | 0.0838  | 0.0726  |
| 7        | H    | 0.0908   | 0.0837  | 0.0726  |
| 8        | H    | 0.1725   | 0.1249  | 0.157   |
| 9        | H    | 0.088    | 0.0812  | 0.069   |
| 10       | H    | 0.0881   | 0.0813  | 0.0691  |
| 11       | H    | 0.0868   | 0.0751  | 0.068   |

Ethers

# 1,3-dioxanel

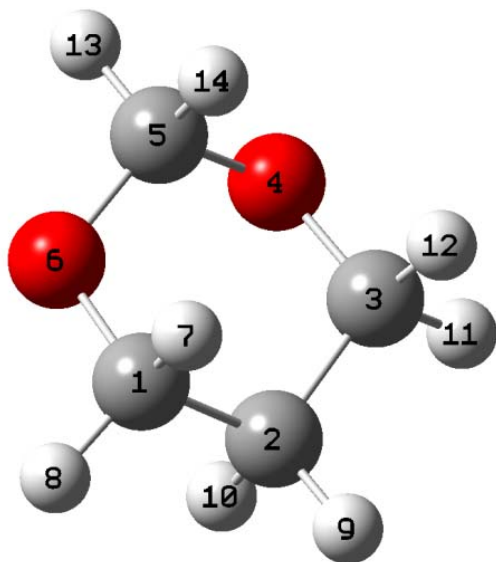

| ATOM NO. | TYPE | MULLIKEN | DPPC    | CM2     |
|----------|------|----------|---------|---------|
| 1        | C    | -0.0224  | 0.0545  | 0.0543  |
| 2        | C    | -0.2263  | -0.2043 | -0.1885 |
| 3        | C    | -0.0223  | 0.0546  | 0.0543  |
| 4        | O    | -0.2902  | -0.3633 | -0.3708 |
| 5        | C    | 0.0927   | 0.2169  | 0.2073  |
| 6        | O    | -0.2902  | -0.3632 | -0.3708 |
| 7        | H    | 0.0672   | 0.0566  | 0.049   |
| 8        | H    | 0.1111   | 0.0823  | 0.093   |
| 9        | H    | 0.0946   | 0.0809  | 0.0761  |
| 10       | H    | 0.106    | 0.0992  | 0.0874  |
| 11       | H    | 0.1111   | 0.0823  | 0.093   |
| 12       | H    | 0.0672   | 0.0566  | 0.0491  |
| 13       | H    | 0.1368   | 0.0924  | 0.1195  |
| 14       | H    | 0.0647   | 0.0545  | 0.0473  |

# 3,4-dihydro-2,4-pyran

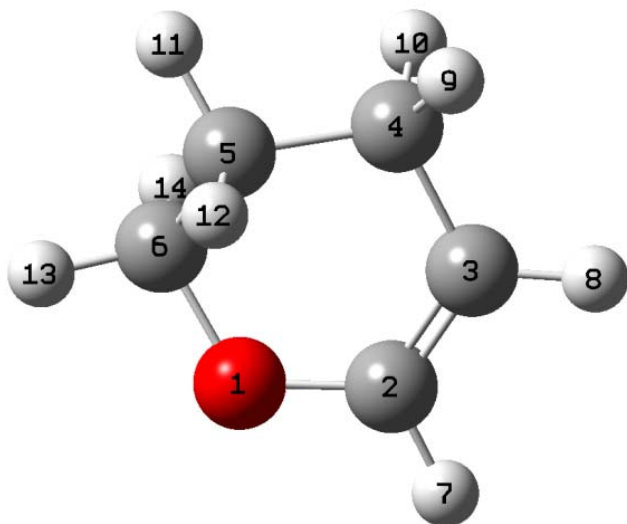

| ATOM NO. | TYPE | MULLIKEN | DPPC    | CM2     |
|----------|------|----------|---------|---------|
| 1        | O    | -0.221   | -0.3085 | -0.3075 |
| 2        | C    | -0.0129  | 0.0945  | 0.0494  |
| 3        | C    | -0.2765  | -0.2365 | -0.2570 |
| 4        | C    | -0.1157  | -0.0966 | -0.0789 |
| 5        | C    | -0.1914  | -0.1706 | -0.1539 |
| 6        | C    | -0.0257  | 0.0544  | 0.0500  |
| 7        | H    | 0.1606   | 0.1084  | 0.1435  |
| 8        | H    | 0.1372   | 0.1065  | 0.1193  |
| 9        | H    | 0.0906   | 0.0727  | 0.0722  |
| 10       | H    | 0.0852   | 0.0719  | 0.0669  |
| 11       | H    | 0.091    | 0.0767  | 0.0723  |
| 12       | H    | 0.0947   | 0.0875  | 0.0761  |
| 13       | H    | 0.1051   | 0.0758  | 0.0870  |
| 14       | H    | 0.0789   | 0.0637  | 0.0607  |

# 3-methylene-oxetane

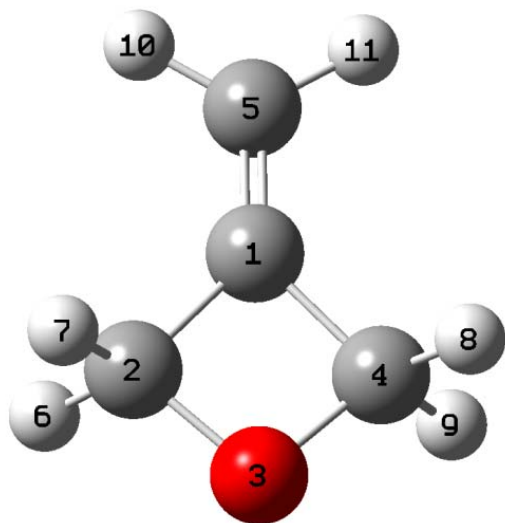

| ATOM NO. | TYPE | MULLIKEN | DPPC    | CM2     |
|----------|------|----------|---------|---------|
| 1        | C    | -0.1769  | -0.1098 | -0.1767 |
| 2        | C    | -0.0065  | 0.0466  | 0.0699  |
| 3        | C    | -0.2826  | -0.3513 | -0.3639 |
| 4        | O    | -0.0064  | 0.0467  | 0.0700  |
| 5        | C    | -0.1885  | -0.1765 | -0.1520 |
| 6        | H    | 0.1037   | 0.0848  | 0.0857  |
| 7        | H    | 0.1039   | 0.0850  | 0.0859  |
| 8        | H    | 0.1039   | 0.0849  | 0.0860  |
| 9        | H    | 0.1034   | 0.0846  | 0.0855  |
| 10       | H    | 0.1230   | 0.1025  | 0.1048  |
| 11       | H    | 0.1230   | 0.1025  | 0.1049  |

# anisole

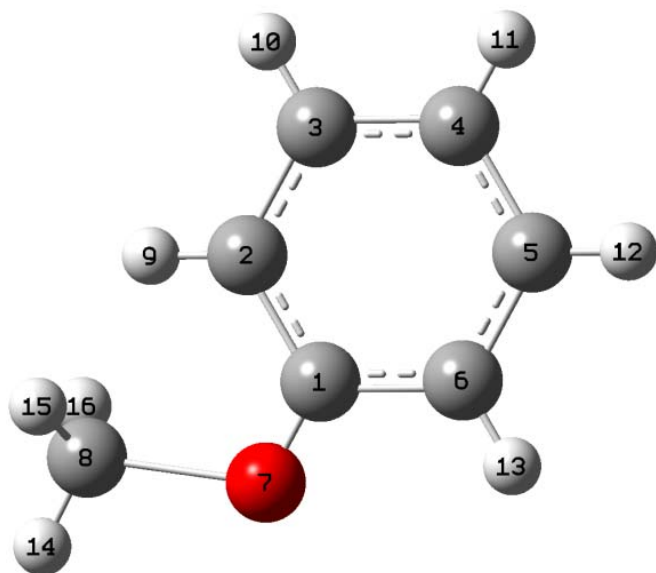

| ATOM NO. | TYPE | MULLIKEN | DPPC    | CM2     |
|----------|------|----------|---------|---------|
| 1        | C    | 0.0776   | 0.1912  | 0.1219  |
| 2        | C    | -0.2036  | -0.1835 | -0.1848 |
| 3        | C    | -0.0958  | -0.0660 | -0.0776 |
| 4        | C    | -0.1648  | -0.1350 | -0.1465 |
| 5        | C    | -0.0998  | -0.0717 | -0.0816 |
| 6        | C    | -0.1558  | -0.1413 | -0.1374 |
| 7        | O    | -0.2117  | -0.3004 | -0.2984 |
| 8        | C    | -0.0758  | -0.0169 | 0.0200  |
| 9        | H    | 0.1360   | 0.1031  | 0.1181  |
| 10       | H    | 0.1308   | 0.0972  | 0.1128  |
| 11       | H    | 0.1324   | 0.0990  | 0.1143  |
| 12       | H    | 0.1330   | 0.0989  | 0.1150  |
| 13       | H    | 0.1481   | 0.1073  | 0.1303  |
| 14       | H    | 0.1051   | 0.0767  | 0.0867  |
| 15       | H    | 0.0721   | 0.0707  | 0.0536  |
| 16       | H    | 0.0720   | 0.0706  | 0.0536  |

# Cis-vinylmethyl

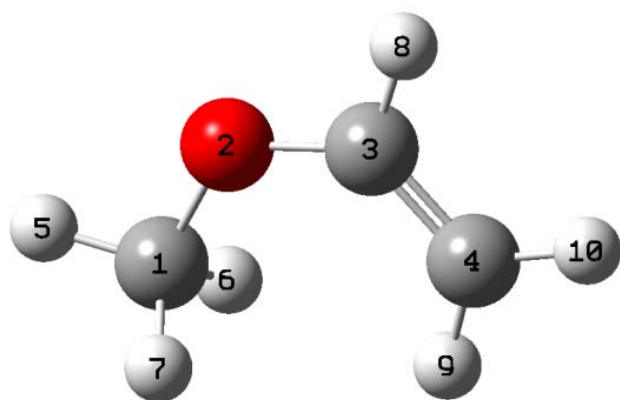

| ATOM NO. | TYPE | MULLIKEN | DPPC    | CM2     |
|----------|------|----------|---------|---------|
| 1        | C    | -0.0804  | -0.0206 | 0.0153  |
| 2        | O    | -0.2225  | -0.3011 | -0.3096 |
| 3        | C    | -0.0108  | 0.0995  | 0.0514  |
| 4        | C    | -0.3375  | -0.3218 | -0.2993 |
| 5        | H    | 0.1023   | 0.0746  | 0.0839  |
| 6        | H    | 0.0711   | 0.0709  | 0.0526  |
| 7        | H    | 0.0711   | 0.0708  | 0.0526  |
| 8        | H    | 0.1583   | 0.1123  | 0.1412  |
| 9        | H    | 0.1207   | 0.1076  | 0.1024  |
| 10       | H    | 0.1276   | 0.1079  | 0.1094  |

# Dimethylether

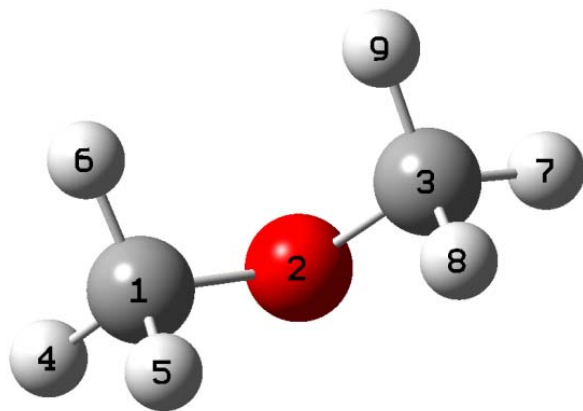

| ATOM NO. | TYPE | MULLIKEN | DPPC    | CM2     |
|----------|------|----------|---------|---------|
| 1        | C    | -0.0759  | -0.0202 | 0.0209  |
| 2        | O    | -0.2765  | -0.3403 | -0.3593 |
| 3        | C    | -0.0759  | -0.0202 | 0.0209  |
| 4        | H    | 0.098    | 0.0766  | 0.0795  |
| 5        | H    | 0.0581   | 0.0569  | 0.0397  |
| 6        | H    | 0.0581   | 0.0568  | 0.0396  |
| 7        | H    | 0.098    | 0.0767  | 0.0795  |
| 8        | H    | 0.0581   | 0.0569  | 0.0397  |
| 9        | H    | 0.0581   | 0.0568  | 0.0396  |



# oxetane

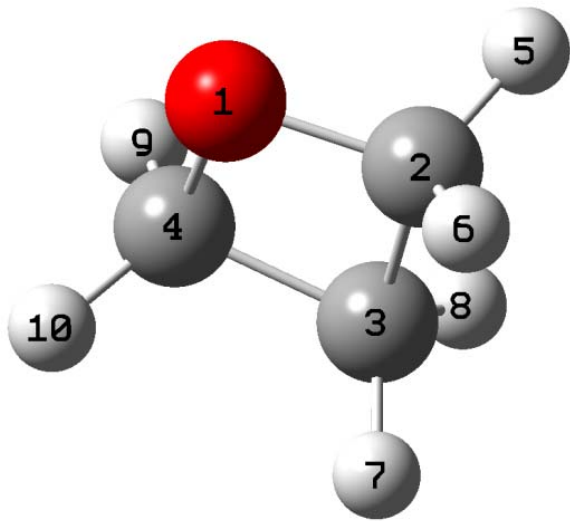

| ATOM NO. | TYPE | MULLIKEN | DPPC    | CM2     |
|----------|------|----------|---------|---------|
| 1        | O    | -0.2837  | -0.3437 | -0.3652 |
| 2        | C    | -0.0384  | 0.0242  | 0.0388  |
| 3        | C    | -0.2185  | -0.2005 | -0.181  |
| 4        | C    | -0.0384  | 0.0242  | 0.0388  |
| 5        | H    | 0.0946   | 0.0792  | 0.0764  |
| 6        | H    | 0.0946   | 0.0791  | 0.0764  |
| 7        | H    | 0.1002   | 0.0896  | 0.0815  |
| 8        | H    | 0.1002   | 0.0896  | 0.0816  |
| 9        | H    | 0.0946   | 0.0792  | 0.0764  |
| 10       | H    | 0.0946   | 0.0791  | 0.0764  |

# tetrahydrofuran

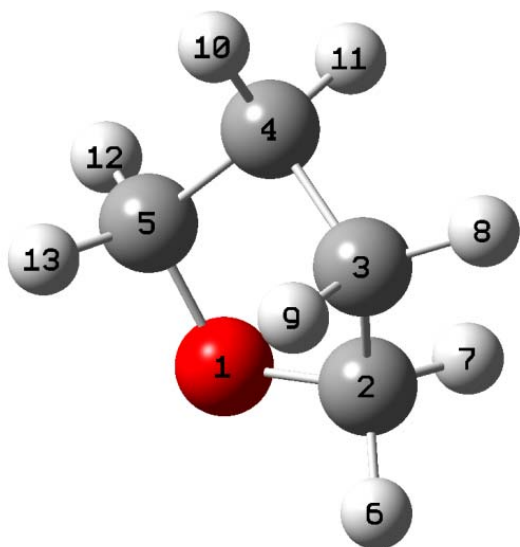

| ATOM NO. | TYPE | MULLIKEN | DPPC    | CM2     |
|----------|------|----------|---------|---------|
| 1        | O    | -0.2838  | -0.3772 | -0.365  |
| 2        | C    | -0.0228  | 0.0563  | 0.0539  |
| 3        | C    | -0.1854  | -0.1634 | -0.148  |
| 4        | C    | -0.1854  | -0.1634 | -0.1475 |
| 5        | C    | -0.0228  | 0.0563  | 0.0535  |
| 6        | H    | 0.0846   | 0.0673  | 0.0647  |
| 7        | H    | 0.0834   | 0.0664  | 0.0673  |
| 8        | H    | 0.0911   | 0.0809  | 0.0724  |
| 9        | H    | 0.0911   | 0.0810  | 0.072   |
| 10       | H    | 0.0911   | 0.0810  | 0.0727  |
| 11       | H    | 0.091    | 0.0809  | 0.0724  |
| 12       | H    | 0.0834   | 0.0664  | 0.0679  |
| 13       | H    | 0.0846   | 0.0673  | 0.0638  |

# tetrahydropyran

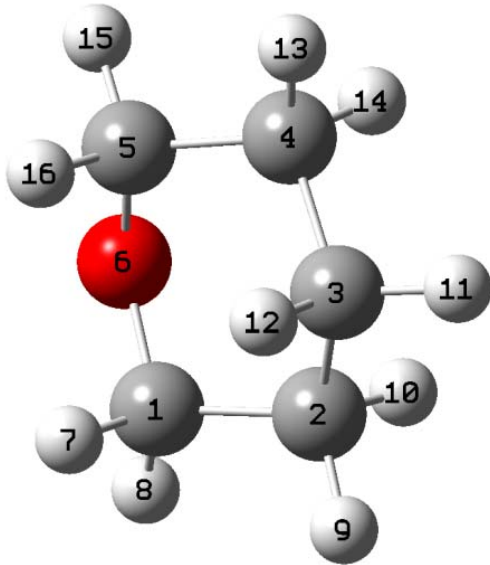

| ATOM NO. | TYPE | MULLIKEN | DPPC    | CM2     |
|----------|------|----------|---------|---------|
| 1        | C    | -0.0232  | 0.0542  | 0.0538  |
| 2        | C    | -0.1911  | -0.1701 | -0.1534 |
| 3        | C    | -0.156   | -0.1330 | -0.1186 |
| 4        | C    | -0.191   | -0.1700 | -0.1534 |
| 5        | C    | -0.0231  | 0.0542  | 0.0538  |
| 6        | O    | -0.2731  | -0.3550 | -0.3552 |
| 7        | H    | 0.0657   | 0.0553  | 0.0476  |
| 8        | H    | 0.1035   | 0.0745  | 0.0854  |
| 9        | H    | 0.0865   | 0.0737  | 0.0678  |
| 10       | H    | 0.092    | 0.0854  | 0.0733  |
| 11       | H    | 0.0835   | 0.0713  | 0.0648  |
| 12       | H    | 0.0789   | 0.0706  | 0.0602  |
| 13       | H    | 0.0864   | 0.0737  | 0.0678  |
| 14       | H    | 0.0919   | 0.0853  | 0.0733  |
| 15       | H    | 0.1035   | 0.0745  | 0.0854  |
| 16       | H    | 0.0657   | 0.0553  | 0.0475  |

# Amines and ammonia

# 1,2,5,6-tetrahydropyridine(ax)

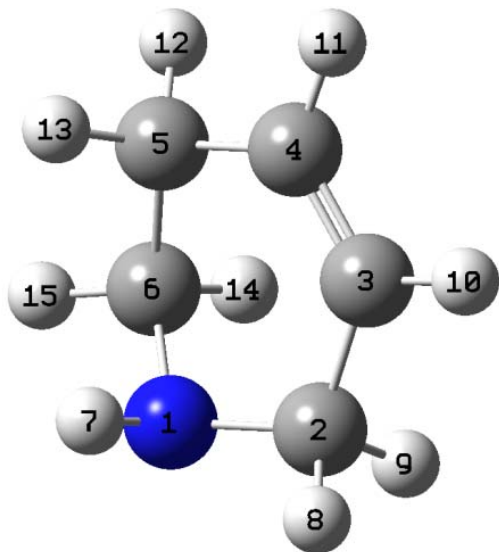

| ATOM NO. | TYPE | MULLIKEN | DPPC    | CM2     |
|----------|------|----------|---------|---------|
| 1        | N    | -0.2738  | -0.6278 | -0.6493 |
| 2        | C    | -0.063   | 0.0751  | 0.0664  |
| 3        | C    | -0.202   | -0.1539 | -0.1823 |
| 4        | C    | -0.1629  | -0.1171 | -0.1446 |
| 5        | C    | -0.17    | -0.1426 | -0.1313 |
| 6        | C    | -0.087   | 0.0560  | 0.0433  |
| 7        | H    | 0.1446   | 0.2858  | 0.3292  |
| 8        | H    | 0.0935   | 0.0774  | 0.0753  |
| 9        | H    | 0.1019   | 0.0576  | 0.0841  |
| 10       | H    | 0.1285   | 0.1044  | 0.1106  |
| 11       | H    | 0.1229   | 0.0972  | 0.1049  |
| 12       | H    | 0.0946   | 0.0803  | 0.0762  |
| 13       | H    | 0.088    | 0.0795  | 0.0697  |
| 14       | H    | 0.0947   | 0.0624  | 0.0763  |
| 15       | H    | 0.09     | 0.0658  | 0.0716  |

# 1,2,5,6-tetrahydropyridine(eq)

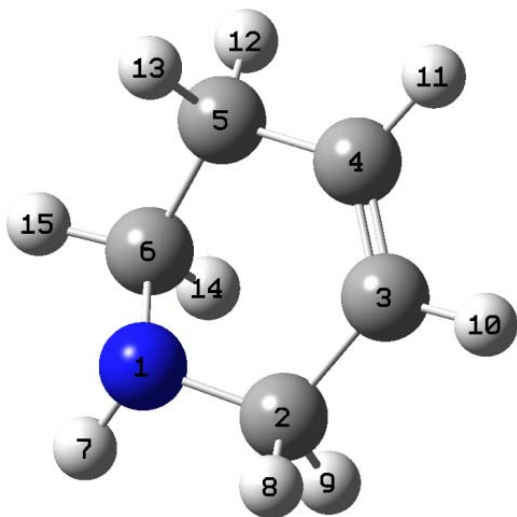

| ATOM NO. | TYPE | MULLIKEN | DPPC    | CM2     |
|----------|------|----------|---------|---------|
| 1        | N    | -0.2993  | -0.5499 | -0.6689 |
| 2        | C    | -0.0474  | 0.0372  | 0.0811  |
| 3        | C    | -0.1735  | -0.1349 | -0.1551 |
| 4        | C    | -0.1575  | -0.1189 | -0.1392 |
| 5        | C    | -0.1310  | -0.1165 | -0.0940 |
| 6        | C    | -0.0708  | 0.0056  | 0.0586  |
| 7        | H    | 0.1573   | 0.2702  | 0.3400  |
| 8        | H    | 0.0980   | 0.0528  | 0.0800  |
| 9        | H    | 0.0548   | 0.0755  | 0.0371  |
| 10       | H    | 0.1266   | 0.0990  | 0.1086  |
| 11       | H    | 0.1233   | 0.0962  | 0.1053  |
| 12       | H    | 0.0871   | 0.0683  | 0.0687  |
| 13       | H    | 0.1000   | 0.0873  | 0.0818  |
| 14       | H    | 0.0450   | 0.0740  | 0.0269  |
| 15       | H    | 0.0875   | 0.0541  | 0.0692  |

# 2-aminopropane

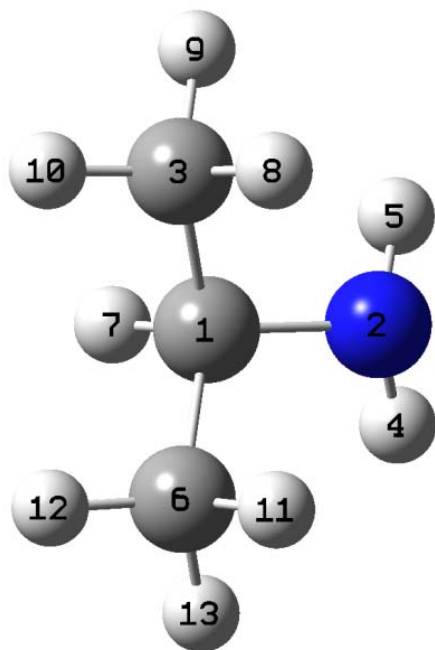

| ATOM NO. | TYPE | MULLIKEN | DPPC    | CM2     |
|----------|------|----------|---------|---------|
| 1        | C    | -0.0281  | 0.0652  | 0.0834  |
| 2        | N    | -0.346   | -0.7517 | -0.8190 |
| 3        | C    | -0.2095  | -0.2087 | -0.1519 |
| 4        | H    | 0.1436   | 0.2959  | 0.3327  |
| 5        | H    | 0.1436   | 0.2957  | 0.3328  |
| 6        | C    | -0.2096  | -0.2087 | -0.1520 |
| 7        | H    | 0.0412   | 0.0884  | 0.0234  |
| 8        | H    | 0.0882   | 0.0793  | 0.0692  |
| 9        | H    | 0.0702   | 0.0654  | 0.0511  |
| 10       | H    | 0.074    | 0.0672  | 0.0549  |
| 11       | H    | 0.0882   | 0.0793  | 0.0692  |
| 12       | H    | 0.0741   | 0.0673  | 0.0550  |
| 13       | H    | 0.0701   | 0.0654  | 0.0511  |

# ammonia

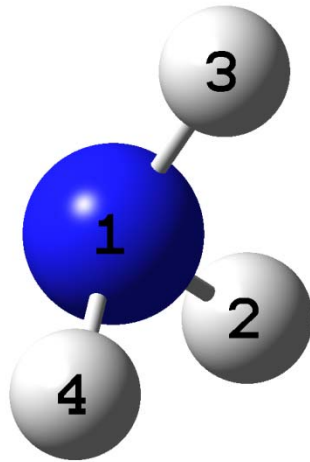

| ATOM NO. | TYPE | MULLIKEN | DPPC    | CM2     |
|----------|------|----------|---------|---------|
| 1        | N    | -0.3959  | -1.1345 | -0.9858 |
| 2        | H    | 0.132    | 0.3782  | 0.3286  |
| 3        | H    | 0.132    | 0.3782  | 0.3286  |
| 4        | H    | 0.132    | 0.3782  | 0.3286  |



# aniline

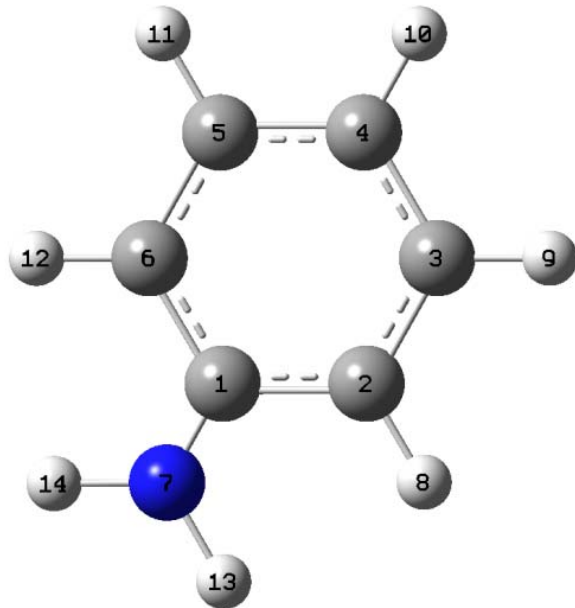

| M NO. | TYPE | MULLIKEN | DPPC    | CM2     |
|-------|------|----------|---------|---------|
| 1     | C    | 0.0553   | 0.3018  | 0.1579  |
| 2     | C    | -0.1907  | -0.2268 | -0.1688 |
| 3     | C    | -0.0934  | -0.0530 | -0.0747 |
| 4     | C    | -0.1729  | -0.1446 | -0.1533 |
| 5     | C    | -0.0934  | -0.0526 | -0.0747 |
| 6     | C    | -0.1907  | -0.2279 | -0.1688 |
| 7     | N    | -0.3276  | -0.9282 | -0.8014 |
| 8     | H    | 0.1302   | 0.1287  | 0.1122  |
| 9     | H    | 0.1287   | 0.0953  | 0.1106  |
| 10    | H    | 0.1306   | 0.0971  | 0.1126  |
| 11    | H    | 0.1286   | 0.0952  | 0.1106  |
| 12    | H    | 0.1301   | 0.1291  | 0.1121  |
| 13    | H    | 0.1826   | 0.3931  | 0.3628  |
| 14    | H    | 0.1825   | 0.3929  | 0.3628  |

# aziridine

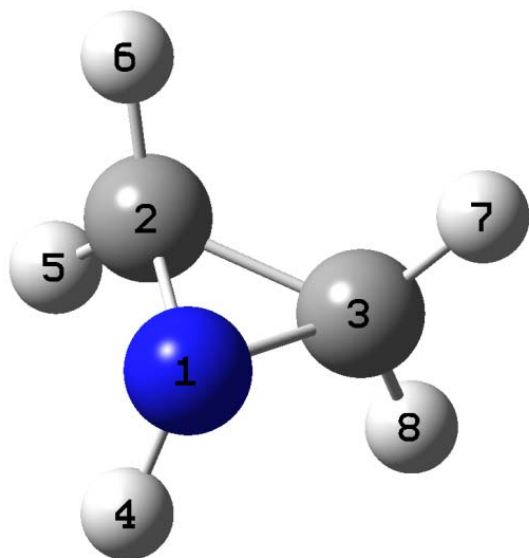

| ATOM NO. | TYPE | MULLIKEN | DPPC    | CM2     |
|----------|------|----------|---------|---------|
| 1        | N    | -0.2316  | -0.5426 | -0.6055 |
| 2        | C    | -0.1876  | -0.0860 | -0.0575 |
| 3        | C    | -0.1876  | -0.0860 | -0.0575 |
| 4        | H    | 0.1441   | 0.3190  | 0.3303  |
| 5        | H    | 0.1018   | 0.1025  | 0.0836  |
| 6        | H    | 0.1295   | 0.0953  | 0.1115  |
| 7        | H    | 0.1296   | 0.0953  | 0.1115  |
| 8        | H    | 0.1018   | 0.1025  | 0.0836  |

# Cyclopropyl amine

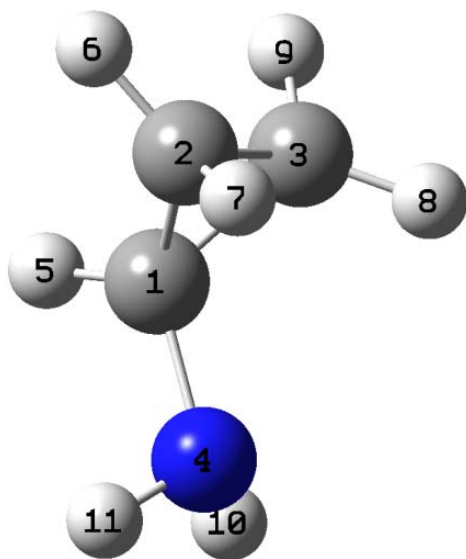

| ATOM NO. | TYPE | MULLIKEN | DPPC    | CM2     |
|----------|------|----------|---------|---------|
| 1        | C    | -0.1062  | 0.0170  | 0.0067  |
| 2        | C    | -0.2006  | -0.1768 | -0.163  |
| 3        | C    | -0.2004  | -0.1766 | -0.1628 |
| 4        | N    | -0.3254  | -0.7407 | -0.7971 |
| 5        | H    | 0.0828   | 0.1099  | 0.0654  |
| 6        | H    | 0.1044   | 0.0843  | 0.086   |
| 7        | H    | 0.1204   | 0.0985  | 0.102   |
| 8        | H    | 0.1205   | 0.0986  | 0.1022  |
| 9        | H    | 0.1044   | 0.0843  | 0.0859  |
| 10       | H    | 0.150    | 0.3004  | 0.3374  |
| 11       | H    | 0.150    | 0.3012  | 0.3373  |

# dimethylamine

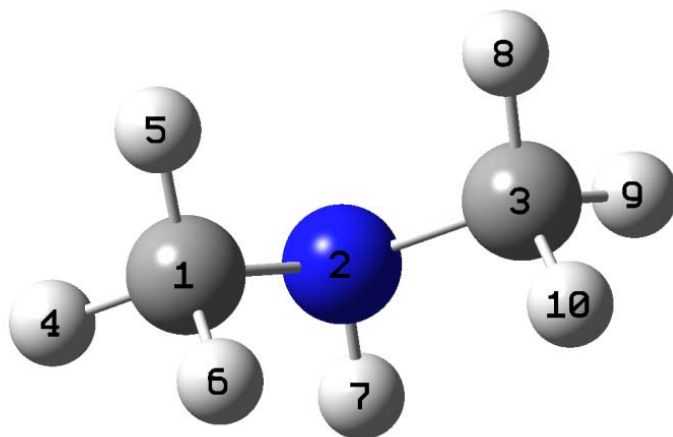

| ATOM NO. | TYPE | MULLIKEN | DPPC    | CM2     |
|----------|------|----------|---------|---------|
| 1        | C    | -0.125   | -0.0503 | 0.0249  |
| 2        | N    | -0.3078  | -0.5532 | -0.6788 |
| 3        | C    | -0.125   | -0.0503 | 0.0249  |
| 4        | H    | 0.0817   | 0.0611  | 0.063   |
| 5        | H    | 0.0829   | 0.0607  | 0.0642  |
| 6        | H    | 0.0378   | 0.0708  | 0.0196  |
| 7        | H    | 0.153    | 0.2686  | 0.3356  |
| 8        | H    | 0.0829   | 0.0607  | 0.0642  |
| 9        | H    | 0.0817   | 0.0611  | 0.063   |
| 10       | H    | 0.0378   | 0.0708  | 0.0196  |

# ethylammonia

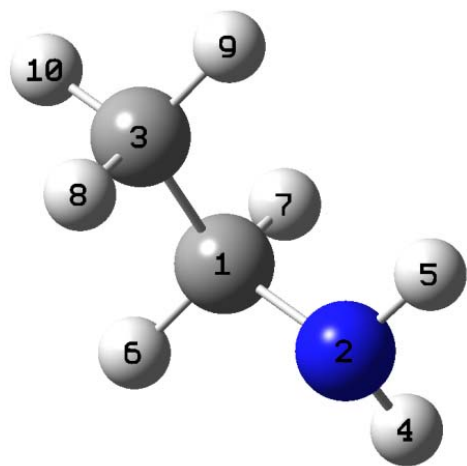

| ATOM NO. | TYPE | MULLIKEN | DPPC    | CM2     |
|----------|------|----------|---------|---------|
| 1        | C    | -0.0785  | 0.0234  | 0.0527  |
| 2        | N    | -0.3491  | -0.7493 | -0.8226 |
| 3        | C    | -0.2148  | -0.2097 | -0.1573 |
| 4        | H    | 0.1446   | 0.2967  | 0.3337  |
| 5        | H    | 0.1407   | 0.2904  | 0.3298  |
| 6        | H    | 0.0873   | 0.0474  | 0.0690  |
| 7        | H    | 0.0362   | 0.0852  | 0.0182  |
| 8        | H    | 0.0879   | 0.0792  | 0.0690  |
| 9        | H    | 0.0697   | 0.0674  | 0.0507  |
| 10       | H    | 0.0759   | 0.0692  | 0.0569  |

# methylammonia

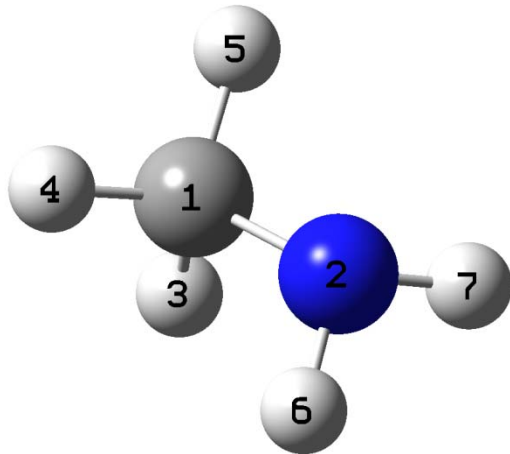

| ATOM NO. | TYPE | MULLIKEN | DPPC    | CM2     |
|----------|------|----------|---------|---------|
| 1        | C    | -0.1287  | -0.0301 | 0.0232  |
| 2        | N    | -0.3515  | -0.7606 | -0.8257 |
| 3        | H    | 0.0309   | 0.0835  | 0.0127  |
| 4        | H    | 0.0821   | 0.0553  | 0.0634  |
| 5        | H    | 0.0822   | 0.0549  | 0.0635  |
| 6        | H    | 0.1425   | 0.2984  | 0.3315  |
| 7        | H    | 0.1425   | 0.2986  | 0.3315  |

# Piperidine(ax)

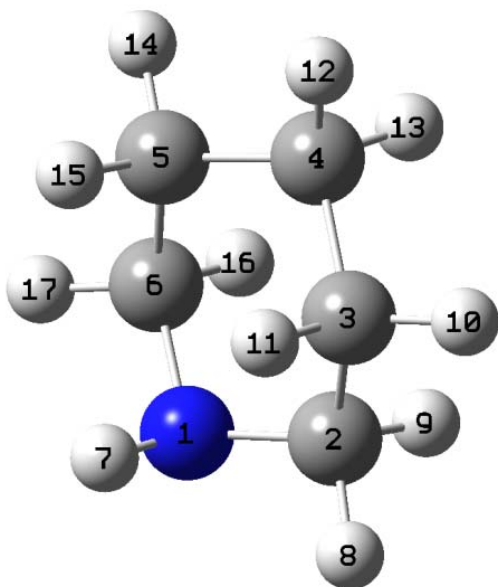

| ATOM NO. | TYPE | MULLIKEN | DPPC    | CM2     |
|----------|------|----------|---------|---------|
| 1        | N    | -0.2752  | -0.6232 | -0.6506 |
| 2        | C    | -0.0872  | 0.0524  | 0.043   |
| 3        | C    | -0.1932  | -0.1639 | -0.1538 |
| 4        | C    | -0.1549  | -0.1308 | -0.1173 |
| 5        | C    | -0.1931  | -0.1639 | -0.1538 |
| 6        | C    | -0.0872  | 0.0524  | 0.0430  |
| 7        | H    | 0.1424   | 0.2842  | 0.3269  |
| 8        | H    | 0.088    | 0.0675  | 0.0695  |
| 9        | H    | 0.0922   | 0.0580  | 0.0738  |
| 10       | H    | 0.0861   | 0.0755  | 0.0674  |
| 11       | H    | 0.078    | 0.0750  | 0.0593  |
| 12       | H    | 0.0791   | 0.0676  | 0.0604  |
| 13       | H    | 0.081    | 0.0731  | 0.0623  |
| 14       | H    | 0.086    | 0.0755  | 0.0674  |
| 15       | H    | 0.078    | 0.0750  | 0.0593  |
| 16       | H    | 0.0921   | 0.0579  | 0.0737  |
| 17       | H    | 0.0879   | 0.0675  | 0.0695  |

# Piperidine(eq)

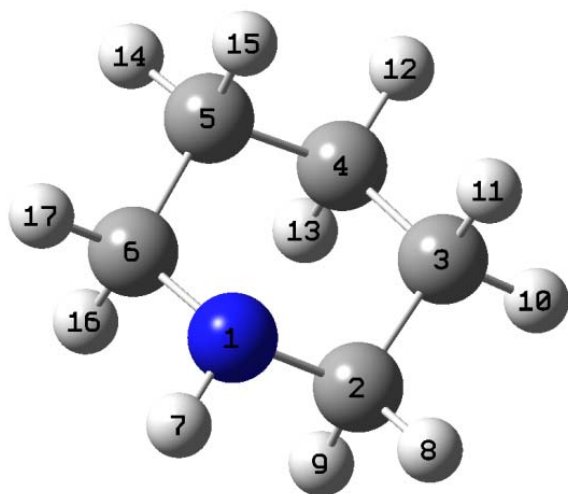

| ATOM NO. | TYPE | MULLIKEN | DPPC    | CM2     |
|----------|------|----------|---------|---------|
| 1        | N    | -0.2982  | -0.5504 | -0.668  |
| 2        | C    | -0.0729  | 0.0056  | 0.0565  |
| 3        | C    | -0.1558  | -0.1393 | -0.1181 |
| 4        | C    | -0.1567  | -0.1360 | -0.1191 |
| 5        | C    | -0.1558  | -0.1393 | -0.1181 |
| 6        | C    | -0.0729  | 0.0057  | 0.0565  |
| 7        | H    | 0.1554   | 0.2716  | 0.3381  |
| 8        | H    | 0.0869   | 0.0548  | 0.0686  |
| 9        | H    | 0.0424   | 0.0717  | 0.0243  |
| 10       | H    | 0.0797   | 0.0659  | 0.061   |
| 11       | H    | 0.0914   | 0.0805  | 0.0727  |
| 12       | H    | 0.0805   | 0.0680  | 0.0618  |
| 13       | H    | 0.076    | 0.0684  | 0.0573  |
| 14       | H    | 0.0797   | 0.0659  | 0.061   |
| 15       | H    | 0.0913   | 0.0804  | 0.0727  |
| 16       | H    | 0.0423   | 0.0717  | 0.0243  |
| 17       | H    | 0.0869   | 0.0548  | 0.0686  |



# trimethylamine

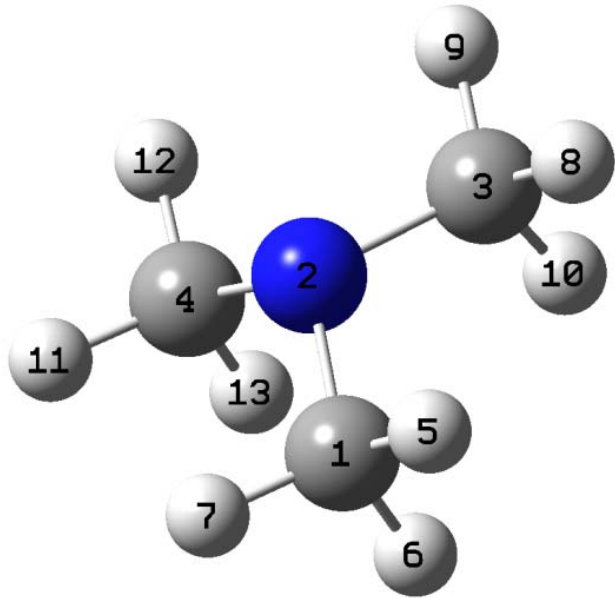

| ATOM NO. | TYPE | MULLIKEN | DPPC    | CM2     |
|----------|------|----------|---------|---------|
| 1        | C    | -0.1188  | -0.0572 | 0.0293  |
| 2        | N    | -0.2667  | -0.4009 | -0.5437 |
| 3        | C    | -0.1188  | -0.0573 | 0.0293  |
| 4        | C    | -0.1188  | -0.0573 | 0.0293  |
| 5        | H    | 0.0824   | 0.0629  | 0.0636  |
| 6        | H    | 0.043    | 0.0648  | 0.0247  |
| 7        | H    | 0.0824   | 0.0632  | 0.0636  |
| 8        | H    | 0.0824   | 0.0631  | 0.0636  |
| 9        | H    | 0.0823   | 0.0630  | 0.0636  |
| 10       | H    | 0.0429   | 0.0648  | 0.0247  |
| 11       | H    | 0.0824   | 0.0629  | 0.0637  |
| 12       | H    | 0.0823   | 0.0632  | 0.0636  |
| 13       | H    | 0.043    | 0.0648  | 0.0247  |

# Amides

# acetamide

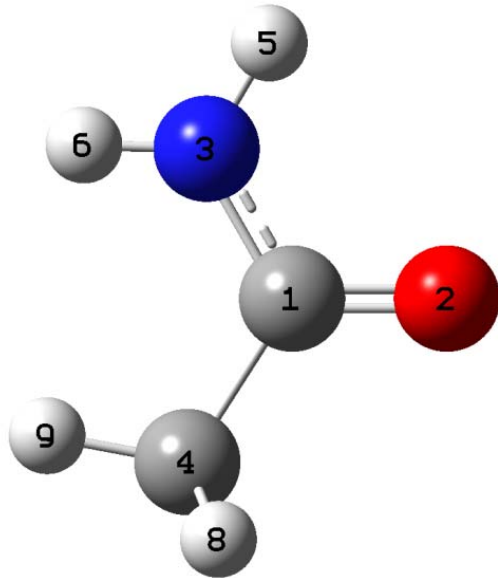

| ATOM NO. | TYPE | MULLIKEN | DPPC    | CM2     |
|----------|------|----------|---------|---------|
| 1        | C    | 0.3000   | 0.4195  | 0.5134  |
| 2        | O    | -0.3744  | -0.4761 | -0.4992 |
| 3        | N    | -0.4427  | -0.4233 | -0.8769 |
| 4        | C    | -0.2421  | -0.2490 | -0.1826 |
| 5        | H    | 0.2291   | 0.2286  | 0.3986  |
| 6        | H    | 0.2176   | 0.2177  | 0.3903  |
| 7        | H    | 0.0980   | 0.0894  | 0.0794  |
| 8        | H    | 0.1176   | 0.1048  | 0.0987  |
| 9        | H    | 0.0970   | 0.0884  | 0.0783  |

# formamide

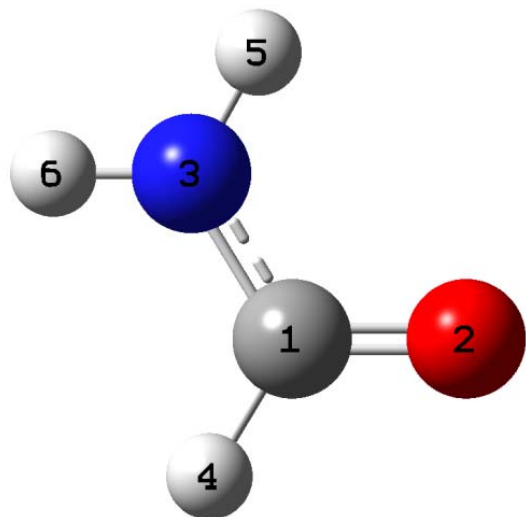

| ATOM NO. | TYPE | MULLIKEN | DPPC    | CM2     |
|----------|------|----------|---------|---------|
| 1        | C    | 0.2575   | 0.3545  | 0.4910  |
| 2        | O    | -0.3706  | -0.4613 | -0.4982 |
| 3        | N    | -0.4483  | -0.4218 | -0.8815 |
| 4        | H    | 0.1190   | 0.0807  | 0.1033  |
| 5        | H    | 0.2232   | 0.2275  | 0.3934  |
| 6        | H    | 0.2192   | 0.2203  | 0.3919  |

# N-methylformamide

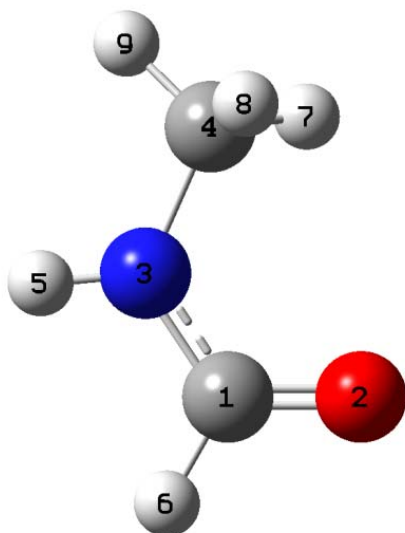

| ATOM NO. | TYPE | MULLIKEN | DPPC    | CM2     |
|----------|------|----------|---------|---------|
| 1        | C    | 0.2541   | 0.3529  | 0.4896  |
| 2        | O    | -0.3633  | -0.4549 | -0.4948 |
| 3        | N    | -0.3977  | -0.3422 | -0.7437 |
| 4        | C    | -0.0757  | -0.0610 | 0.0625  |
| 5        | H    | 0.2224   | 0.2274  | 0.3904  |
| 6        | H    | 0.1172   | 0.0794  | 0.1019  |
| 7        | H    | 0.0737   | 0.0756  | 0.0976  |
| 8        | H    | 0.0939   | 0.0672  | 0.0485  |
| 9        | H    | 0.0754   | 0.0556  | 0.0479  |

# Imines and Naromatics

# 2-methylpyrimidine

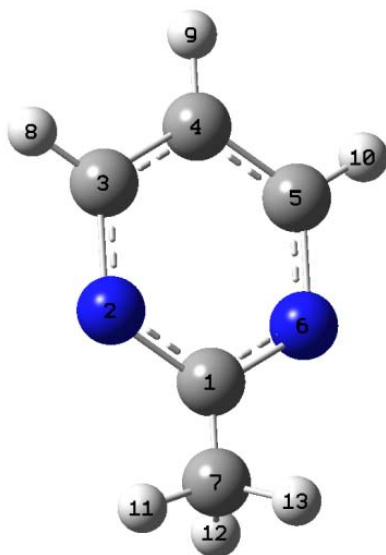

| ATOM NO. | TYPE | MULLIKEN | DPPC    | CM2     |
|----------|------|----------|---------|---------|
| 1        | C    | 0.0272   | 0.3430  | 0.2915  |
| 2        | N    | -0.1727  | -0.4363 | -0.4578 |
| 3        | C    | -0.0343  | 0.1354  | 0.1323  |
| 4        | C    | -0.2424  | -0.1905 | -0.2204 |
| 5        | C    | -0.0337  | 0.1404  | 0.1339  |
| 6        | N    | -0.1741  | -0.4447 | -0.4593 |
| 7        | C    | -0.1599  | -0.1634 | -0.1017 |
| 8        | H    | 0.1643   | 0.1210  | 0.1470  |
| 9        | H    | 0.1544   | 0.1210  | 0.1366  |
| 10       | H    | 0.1643   | 0.1210  | 0.1470  |
| 11       | H    | 0.1038   | 0.0804  | 0.0850  |
| 12       | H    | 0.1017   | 0.0862  | 0.0831  |
| 13       | H    | 0.1013   | 0.0864  | 0.0828  |

# E-acetaldimine

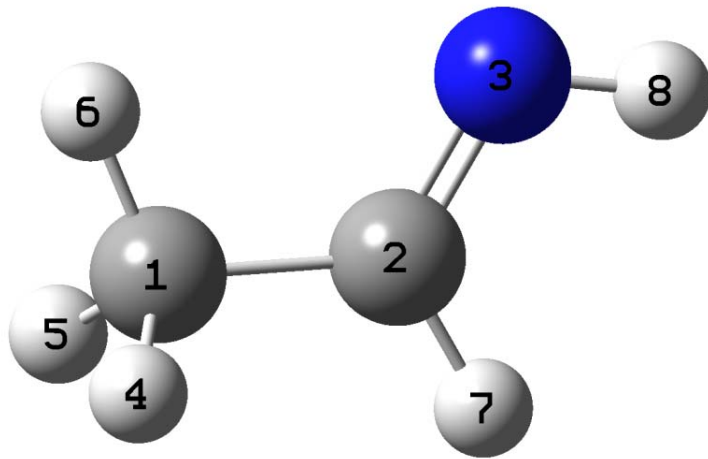

| ATOM NO. | TYPE | MULLIKEN | DPPC    | CM2     |
|----------|------|----------|---------|---------|
| 1        | C    | -0.1982  | -0.1933 | -0.1409 |
| 2        | C    | -0.064   | 0.0956  | 0.1549  |
| 3        | N    | -0.2353  | -0.5590 | -0.6244 |
| 4        | H    | 0.0883   | 0.0791  | 0.0697  |
| 5        | H    | 0.0885   | 0.0794  | 0.0699  |
| 6        | H    | 0.1021   | 0.0881  | 0.0832  |
| 7        | H    | 0.0807   | 0.0985  | 0.0637  |
| 8        | H    | 0.138    | 0.3115  | 0.3239  |



# N-methylacetaldimine

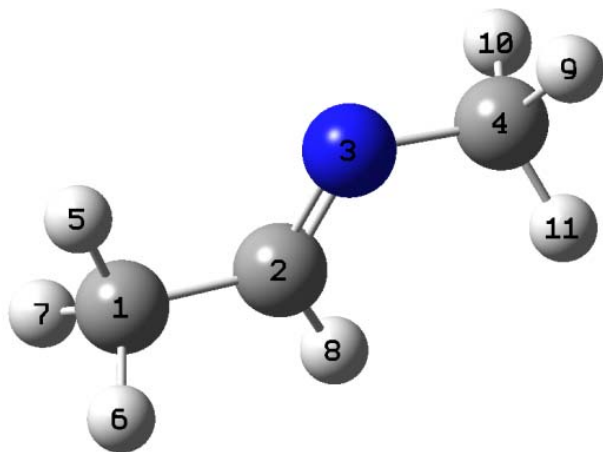

| ATOM NO. | TYPE | MULLIKEN | DPPC    | CM2     |
|----------|------|----------|---------|---------|
| 1        | C    | -0.1922  | -0.1877 | -0.135  |
| 2        | C    | -0.0747  | 0.0762  | 0.1377  |
| 3        | N    | -0.1902  | -0.4130 | -0.4820 |
| 4        | C    | -0.1521  | -0.0588 | -0.0020 |
| 5        | H    | 0.1001   | 0.0869  | 0.0812  |
| 6        | H    | 0.087    | 0.0773  | 0.0684  |
| 7        | H    | 0.0873   | 0.0776  | 0.0687  |
| 8        | H    | 0.0886   | 0.0984  | 0.0716  |
| 9        | H    | 0.0968   | 0.0869  | 0.0785  |
| 10       | H    | 0.0967   | 0.0870  | 0.0784  |
| 11       | H    | 0.0528   | 0.0691  | 0.0343  |

# N-methylformaldimine

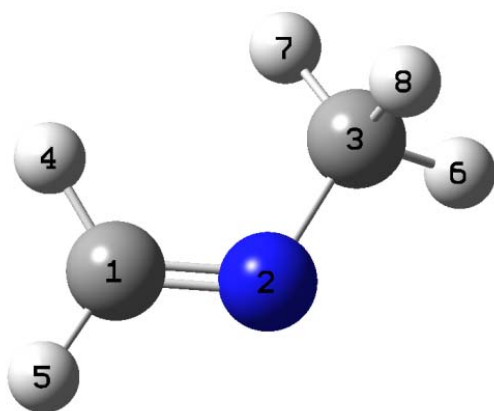

| ATOM NO. | TYPE | MULLIKEN | DPPC    | CM2     |
|----------|------|----------|---------|---------|
| 1        | C    | -0.1274  | 0.0118  | 0.1078  |
| 2        | N    | -0.1821  | -0.4008 | -0.4775 |
| 3        | C    | -0.16    | -0.0644 | -0.0102 |
| 4        | H    | 0.0858   | 0.0994  | 0.0686  |
| 5        | H    | 0.1322   | 0.1039  | 0.1147  |
| 6        | H    | 0.0985   | 0.0888  | 0.0802  |
| 7        | H    | 0.0544   | 0.0727  | 0.0359  |
| 8        | H    | 0.0986   | 0.0887  | 0.0803  |

# pyridine

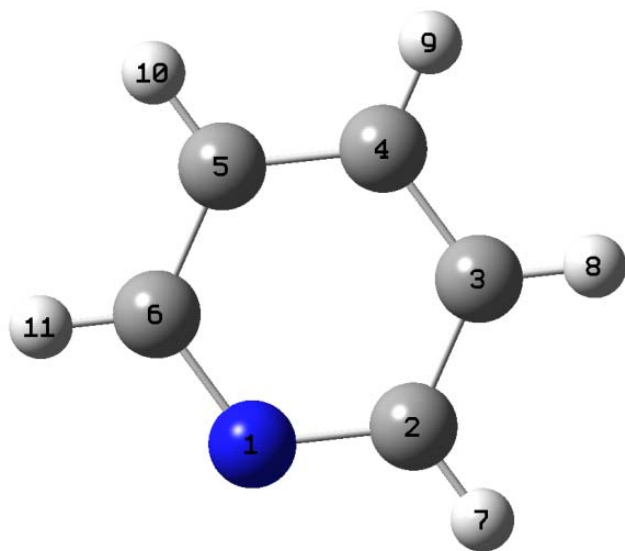

| ATOM NO. | TYPE | MULLIKEN | DPPC    | CM2     |
|----------|------|----------|---------|---------|
| 1        | N    | -0.1386  | -0.4184 | -0.4296 |
| 2        | C    | -0.0725  | 0.0984  | 0.0845  |
| 3        | C    | -0.1814  | -0.1390 | -0.1616 |
| 4        | C    | -0.0932  | -0.0545 | -0.0671 |
| 5        | C    | -0.1814  | -0.1390 | -0.1616 |
| 6        | C    | -0.0725  | 0.0984  | 0.0845  |
| 7        | H    | 0.1584   | 0.1145  | 0.1410  |
| 8        | H    | 0.1427   | 0.1102  | 0.1248  |
| 9        | H    | 0.1374   | 0.1046  | 0.1194  |
| 10       | H    | 0.1427   | 0.1102  | 0.1248  |
| 11       | H    | 0.1584   | 0.1145  | 0.1410  |

# pyrrole

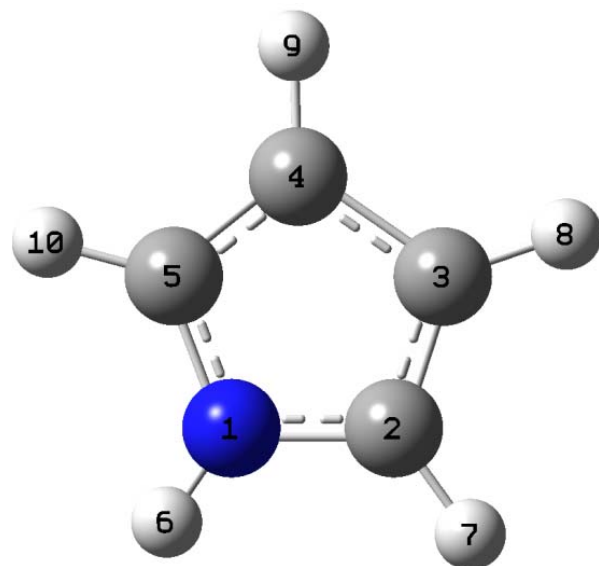

| ATOM NO. | TYPE | MULLIKEN | DPPC    | CM2     |
|----------|------|----------|---------|---------|
| 1        | N    | -0.1808  | -0.1135 | -0.5844 |
| 2        | C    | -0.1456  | -0.1135 | -0.0153 |
| 3        | C    | -0.1964  | -0.1776 | -0.1718 |
| 4        | C    | -0.1964  | -0.1777 | -0.1718 |
| 5        | C    | -0.1455  | -0.1135 | -0.0153 |
| 6        | H    | 0.2409   | 0.2336  | 0.4053  |
| 7        | H    | 0.1619   | 0.1187  | 0.1445  |
| 8        | H    | 0.1500   | 0.1124  | 0.1322  |
| 9        | H    | 0.1500   | 0.1124  | 0.1322  |
| 10       | H    | 0.1619   | 0.1187  | 0.1445  |

# Z-acetaldimine

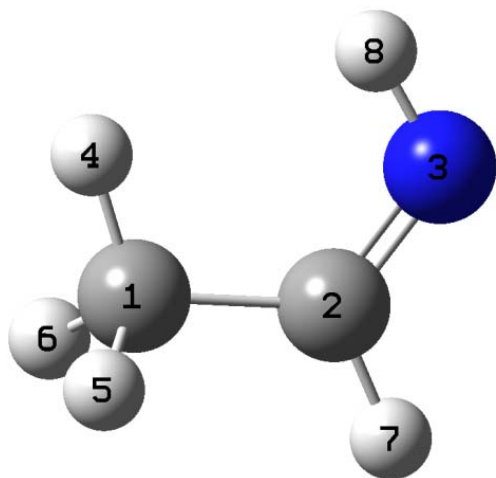

| ATOM NO. | TYPE | MULLIKEN | DPPC    | CM2     |
|----------|------|----------|---------|---------|
| 1        | C    | -0.246   | -0.2336 | -0.1863 |
| 2        | C    | -0.067   | 0.1410  | 0.1526  |
| 3        | N    | -0.2311  | -0.6006 | -0.6222 |
| 4        | H    | 0.0825   | 0.0813  | 0.0635  |
| 5        | H    | 0.0953   | 0.0897  | 0.0767  |
| 6        | H    | 0.0954   | 0.0898  | 0.0768  |
| 7        | H    | 0.139    | 0.1023  | 0.1217  |
| 8        | H    | 0.1321   | 0.3301  | 0.3172  |
